# Supplementary material
Source: PubMed Central journal article supplement (PMC4896312)
Supplement: NIHMS773835-supplement-INFO.pdf [file NIHMS773835-supplement-INFO.pdf]

## Supplementary Information for “Rare Copy Number Variants and Congenital Heart Defects in the 22q11.2 Deletion Syndrome”

Elisabeth E. Mlynarski,<sup>1</sup> Michael Xie,<sup>2</sup> Deanne Taylor,<sup>2</sup> Molly B. Sheridan,<sup>1</sup> Tingwei Guo,<sup>3</sup> Silvia E. Racedo,<sup>3</sup> Donna M. McDonald-McGinn,<sup>1,4</sup> Eva W.C. Chow,<sup>5</sup> Jacob Vorstman,<sup>6</sup> Ann Swillen,<sup>7</sup> Koen Devriendt,<sup>7</sup> Jeroen Breckpot,<sup>7</sup> Maria Cristina Digilio,<sup>8</sup> Bruno Marino,<sup>9</sup> Bruno Dallapiccola,<sup>8</sup> Nicole Philip,<sup>10</sup> Tony J. Simon,<sup>11</sup> Amy E. Roberts,<sup>12</sup> Małgorzata Piotrowicz,<sup>13</sup> Carrie E. Bearden,<sup>14</sup> Stephan Eliez,<sup>15</sup> Doron Gothelf,<sup>16</sup> Karlene Coleman,<sup>17</sup> Wendy R. Kates,<sup>18</sup> Marcella Devoto,<sup>1,4,19,20</sup> Elaine Zackai,<sup>1,4</sup> Damian Heine-Suñer,<sup>21</sup> Elizabeth Goldmuntz,<sup>4,22</sup> Anne S. Bassett,<sup>5</sup> Bernice E. Morrow,<sup>3</sup> Beverly S. Emanuel,<sup>1,4,\*</sup> and the International Chromosome 22q11.2 Consortium

<sup>1</sup>Division of Human Genetics, Children’s Hospital of Philadelphia, Philadelphia, PA 19104, USA; <sup>2</sup>Department of Biomedical and Health Informatics, Children’s Hospital of Philadelphia, Philadelphia, PA 19104, USA; <sup>3</sup>Department of Genetics, Albert Einstein College of Medicine, Bronx, NY 10461, USA; <sup>4</sup>Department of Pediatrics, Perelman School of Medicine, University of Pennsylvania, Philadelphia, PA 19104, USA; <sup>5</sup>Clinical Genetics Research Program, Centre for Addiction and Mental Health and Department of Psychiatry, University of Toronto, Toronto, ON M5T 1R8, Canada; <sup>6</sup>Department of Psychiatry, Brain Center Rudolf Magnus, University Medical Center Utrecht, Utrecht 3584, the Netherlands; <sup>7</sup>Center for Human Genetics, University of Leuven, Leuven 3000, Belgium; <sup>8</sup>Medical Genetics, Bambino Gesù Hospital, 00165 Rome, Italy; <sup>9</sup>Lorillard Spencer Cenci Foundation and Department of Pediatrics, La Sapienza University of Rome, Rome 00165, Italy; <sup>10</sup>Department of Medical Genetics, AP-HM and University of Mediterranee, Timone Children’s Hospital, Marseille 13005, France; <sup>11</sup>M.I.N.D. Institute & Department of Psychiatry and Behavioral Sciences, University of California, Sacramento, CA 95817, USA; <sup>12</sup>Department of Cardiology and Division of Genetics, Boston Children’s Hospital, Boston, MA 02115, USA; <sup>13</sup>Department of Genetics, Polish Mother’s Memorial Hospital - Research Institute, 93-338 Łódź, Poland; <sup>14</sup>Department of Psychiatry and Biobehavioral Sciences, Semel Institute for Neuroscience and Human Behavior, University of California, Los Angeles, CA 90095, USA; <sup>15</sup>Office Médico- Pédagogique Research Unit, Department of Psychiatry, University of Geneva School of Medicine, 1211 Geneva 8, Switzerland; <sup>16</sup>Edmond and Lily Safra Children’s Hospital, Sheba Medical Center, Tel Hashomer, and affiliated with the Sackler Faculty of Medicine, Tel Aviv University, Tel Aviv 52621, Israel; <sup>17</sup>Children’s Healthcare of Atlanta and Emory University School of Nursing, Atlanta, GA 30322, USA; <sup>18</sup>Department of Psychiatry and Behavioral Sciences, and Program in Neuroscience, SUNY Upstate Medical University, Syracuse, NY 13210, USA; <sup>19</sup>Department of Biostatistics and Epidemiology, Perelman School of Medicine, University of Pennsylvania, Philadelphia, PA 19104, USA; <sup>20</sup>Department of Molecular Medicine, University of Rome La Sapienza, Rome 00185, Italy; <sup>21</sup>Genetics Department, Hospital Universitari Son Espases, Palma de Mallorca 07020, Spain; <sup>22</sup>Division of Cardiology, Children’s Hospital of Philadelphia, Philadelphia, PA 19104, USA

## Contents

|                                                                                               |    |
|-----------------------------------------------------------------------------------------------|----|
| 1. Mouse gene expression profiling of developing heart and pharyngeal arches at day E9.5 .... | 4  |
| 2. <0.1% Rare CNV Burden.....                                                                 | 6  |
| 3. The CNV map and rare CNV burden .....                                                      | 7  |
| 4. References .....                                                                           | 9  |
| 5. Supplementary Figures .....                                                                | 10 |
| Fig. S1: All 22q11DS CNVs vs Inclusive CNV Map – by CN type .....                             | 10 |
| Fig. S2: All 22q11DS CNVs vs Inclusive CNV Map – all CNVRs .....                              | 10 |
| Fig. S3: All 22q11DS CNVs vs Stringent CNV Map – by CN type .....                             | 11 |
| Fig. S4: All 22q11DS CNVs vs Stringent CNV Map – all CNVRs.....                               | 11 |
| Fig. S5: qPCR validation of the <i>MYH11</i> deletion .....                                   | 12 |
| Fig. S6: qPCR validation of the <i>CDH2</i> deletion.....                                     | 13 |
| Fig. S7: Other previously reported CNVs detected in 22q11DS subjects with CHDs.....           | 14 |
| Fig. S8: qPCR validation of the <i>LTBP1</i> duplication .....                                | 15 |
| 6. Supplementary Tables .....                                                                 | 16 |
| Table S1: <0.1% rare CNV burden.....                                                          | 16 |
| Table S2: Inclusive CNV map comparison – by CN type .....                                     | 17 |
| Table S3: Inclusive CNV map comparison – all CNVRs.....                                       | 17 |
| Table S4: Stringent CNV map comparison – by CN type .....                                     | 18 |
| Table S5: Stringent CNV map comparison – all CNVRs.....                                       | 18 |
| Table S6: Inclusive CNV map (by CN type) ultra-rare CNV burden.....                           | 19 |
| Table S7: Inclusive CNV map (all CNVRs) ultra-rare CNV burden .....                           | 20 |

|                                                                           |    |
|---------------------------------------------------------------------------|----|
| Table S8: Stringent CNV map (by CN type) ultra-rare CNV burden .....      | 21 |
| Table S9: Stringent CNV map (all CNVRs) ultra-rare CNV burden .....       | 22 |
| Table S10: qPCR validated Rare CNVs.....                                  | 23 |
| Table S11: Mammalian Phenotype Analysis – ALL rare CNVs (<1.0%) .....     | 24 |
| Table S12: Mammalian Phenotype Analysis – rare Deletions (<1.0%).....     | 25 |
| Table S13: Mammalian Phenotype Analysis – rare Duplications (<1.0%) ..... | 26 |
| Table S14: Gene Ontology – ALL rare CNVs (<1.0%).....                     | 27 |
| Table S15: Gene Ontology – rare Deletions (<1.0%) .....                   | 28 |
| Table S16: Gene Ontology – rare Duplications (<1.0%).....                 | 29 |
| Table S17: GSEA/MSigDB – ALL rare CNVs (<1.0%) .....                      | 30 |
| Table S18: GSEA/ MSigDB – rare Deletions (<1.0%) .....                    | 31 |
| Table S19: GSEA/ MSigDB – rare Duplications (<1.0%) .....                 | 32 |

## **Mouse gene expression profiling of developing heart and pharyngeal arches at day E9.5**

Wild type mice maintained congenic in the Swiss Webster background were used for mouse expression studies. To obtain enough RNA for microarray hybridization experiments, micro-dissected pharyngeal arches and heart tubes from eighteen wild type embryos at E9.5 (19 - 21 somites pairs) were pooled in groups of six. At least three microarrays were performed per embryonic tissue. The tissue was homogenized in Buffer RLT (QIAGEN). Total RNA was isolated with the RNeasy Micro Kit according to the manufacturer's protocol. Quality and quantity of total RNA were determined using an Agilent 2100 Bioanalyzer (Agilent) and an ND-1000 Spectrophotometer (NanoDrop), respectively. Biotinylated single-stranded cDNA targets were amplified from 100 nanograms (ng) starting total RNA using the Ovation RNA Amplification System V2 and FLOvation cDNA Biotin Module V2 (NuGEN). A total of 3.75 mg of cDNA from the last step was hybridized to the GeneChip Test3 array (Affymetrix) to test the quality of the labeled target. Nucleic acid samples that passed quality control were then hybridized to the Affymetrix Mouse GeneST 1.0. Hybridization, washing, staining and scanning were performed in the Genomics Core at Einstein (<http://www.einstein.yu.edu/genetics/CoreFacilities.aspx?id=23934>) according to the Affymetrix manual.

The resulting microarray data was then analyzed with oligo and limma (Linear Models for Microarray Analysis), which are two libraries present in the R package. Briefly, the original Affymetrix GeneChip CEL files generated by the Genomics Core were imported and summarized at the probe set level or at the transcript cluster level using the oligonucleotide library. Robust multi-array average (RMA) method was used to normalize, background correct and summarize.

The data were converted to logarithmic scale and the significance analysis was performed using the two-sample t-test with a cut-off of unadjusted P-value of 0.05. The statistical analysis was performed using the Limma package.

Mouse transcripts were compiled by tissue type and converted to human gene designations. Genes were then ranked by expression level to identify the top 25% of genes with the highest expression in each tissue. The “Heart\_High” list contains the top quartile of genes (n = 3,872) expressed in the developing mouse heart at day E9.5 (Supplementary appendix 1). The “PA\_High” list contains the top quartile of genes (n = 3,873) expressed in the pharyngeal apparatus at day E9.5 (Supplementary appendix 2).

### **<0.1% Rare CNV Burden**

Various frequency cutoffs have been used to define rare CNVs in other studies, therefore a more stringent CNV frequency threshold of <0.1% was also employed to further examine rare CNV burden in 22q11DS individuals. A total of 3,753 CNVs (28.20% of all 22q11DS CNVs), 3,280 deletions and 473 duplications, occurred at a frequency <0.1% in the healthy population control cohort (nstd100 (Coe et al. 2014)). The CNV burden analyses were repeated using this subset of rare CNVs (Table S1). There was no significant difference in the number ( $3.98 \pm 2.53$  vs  $3.94 \pm 2.37$ ,  $p = 0.94$ ), or the mean size ( $56.09 \pm 88.66$  kb vs  $56.78 \pm 89.24$  kb,  $p = 0.64$ ) of rare CNVs in 22q11DS individuals with CHDs compared to those with a normal heart and aortic arch (Table S1a). The results of the rare deletion (Table S1b) and rare duplication (Table S1c) analyses were consistent and showed that CNV burden, both in terms of number and size of <0.1% rare CNVs, was equivalent in CHD cases and controls with 22q11DS.

## The CNV map and rare CNV burden

Since there was no difference in burden at either CNV frequency, the CNV map recently published by Zarrei et al. (Zarrei et al. 2015) was also utilized to fully assess rare CNV burden in 22q11DS. The CNV map contains the copy number variable regions (CNVRs) identified in healthy phenotypically normal individuals from 26 different studies, and thus can provide a comprehensive indication of CNV frequency in the general population (Zarrei et al. 2015). The CNV map does not contain the control cohort (nstd100 (Coe et al. 2014)) that was used to identify rare CNVs. All 13,310 autosomal CNVs detected in the 22q11DS cohort were included in the various CNV map analyses.

The 12,095 deletions and 1,215 duplications detected in the 22q11DS cohort were first compared to the inclusive CNV map by CN type. The majority of the 22q11DS deletions overlapped with CNVR losses, as only ~7% of deletions in CHD cases or controls were outside of the inclusive CNV map (Table S2). In contrast, ~45% of 22q11DS duplications were outside the inclusive CNV map (Table S2), indicating that over half of the duplications detected in 22q11DS subjects have not been seen in healthy controls. To address this possibility and determine if 22q11DS CNVs outside the CNV map were indeed rare, CNV frequency was assessed using the published control cohort (Coe et al. 2014). Nearly all deletions, as opposed to ~86% of duplications, outside of the CNV map were observed at a frequency <1.0% in the control cohort (Fig. S1; Table S2).

The discrepancies between deletions and duplications could be due to the paucity of CNVR gains in the CNV map (3,132 CNVR gains as opposed to 23,438 CNVR losses) (Zarrei et al.

2015). Therefore, the 22q11DS deletions and duplications were also analyzed with respect to all variants in the inclusive CNV map (CNVR gains and CNVR losses combined). The combination of all CNVRs had little effect on deletions, whereas the number of duplications outside the inclusive CNV map decreased to ~20% (Fig. S2; Table S3).

Additional CNV map analyses were performed using the stringent CNV map (Fig. S3-S4; Table S4-S5). The overall number of 22q11DS CNVs outside the CNV map increased since fewer 22q11DS CNVs overlapped with stringent CNVRs, the results of the stringent CNV map by CN type (Fig. S3; Table S4) and all CNVRs (Fig. S4; Table S5) analyses were proportionally consistent with the inclusive CNV map. Interestingly, the percentage of outside CNVs that were also rare in the published control cohort did not change even though the number of CNVs outside the stringent map was greater than the inclusive map.

The 22q11DS CNVs that were absent from the CNV map and rare in the published control cohort were classified as “ultra rare”. These CNVs were of particular interest and additional analyses were performed with the “ultra rare” CNVs from each CNV map comparison to investigate if perhaps 22q11DS individuals with CHDs carried a greater burden of “ultra rare” CNVs. The mean number and size of “ultra rare” CNVs carried in each subject was evaluated to assess the “ultra rare” CNV load. Separate burden analyses were performed using all “ultra rare” CNVs, the “ultra rare” deletions and “ultra rare” duplications; this process was repeated with the “ultra rare” CNVs from each of the four CNV map comparisons. The burden analyses revealed that there was no significant difference in the number or mean size of “ultra rare”



CNVs detected in 22q11DS individuals with CHDs compared to those with normal heart anatomy (Table S6-S9).

## References

- Coe BP et al. (2014) Refining analyses of copy number variation identifies specific genes associated with developmental delay *Nature genetics* 46:1063-1071 doi:10.1038/ng.3092
- Zarrei M, MacDonald JR, Merico D, Scherer SW (2015) A copy number variation map of the human genome *Nat Rev Genet* 16:172-183 doi:10.1038/nrg3871

**Figure S1**

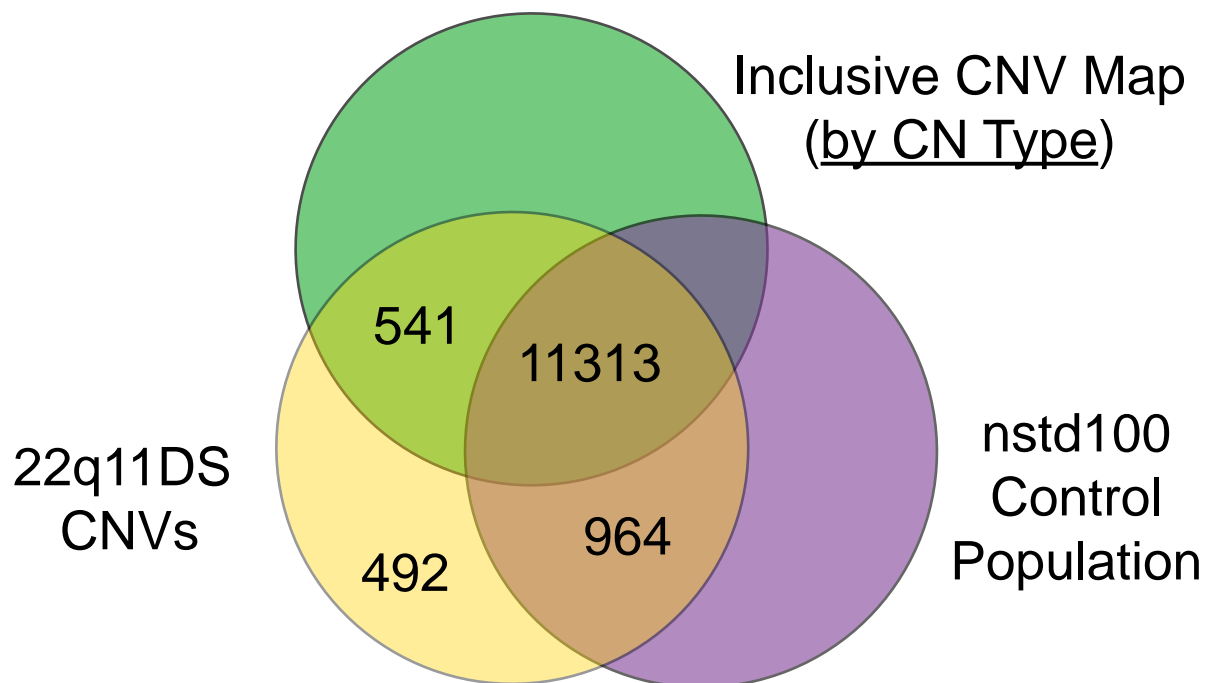

**Figure S2**

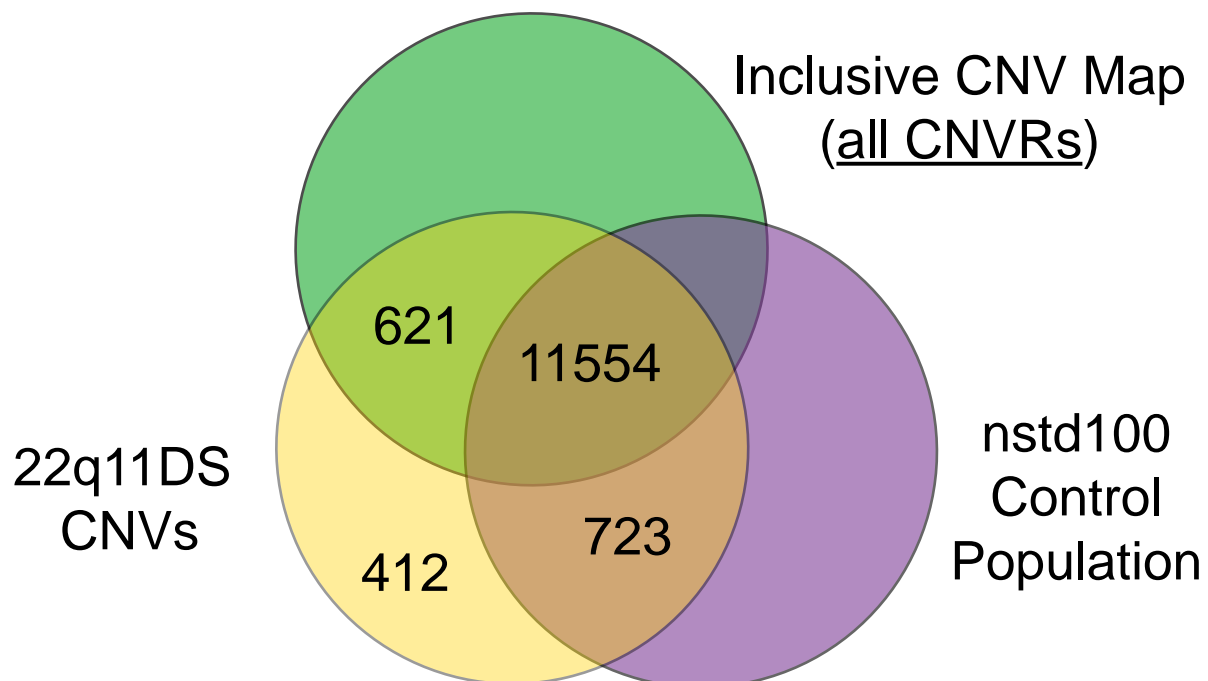

**Figure S3**

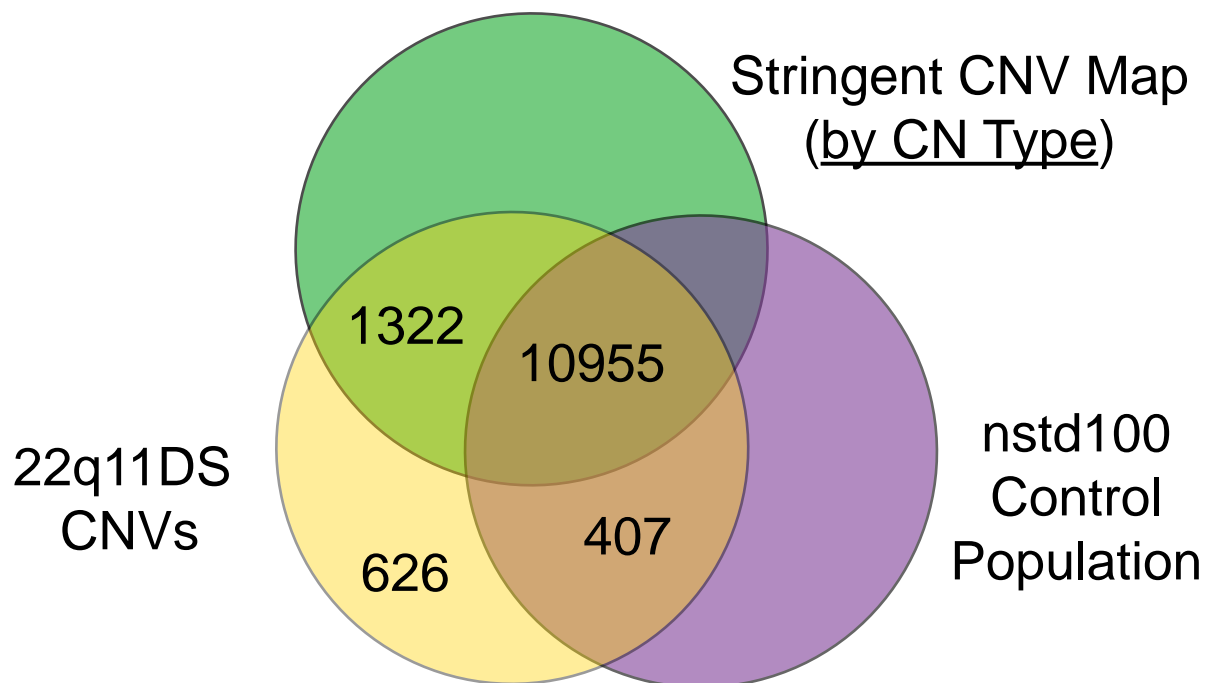

**Figure S4**

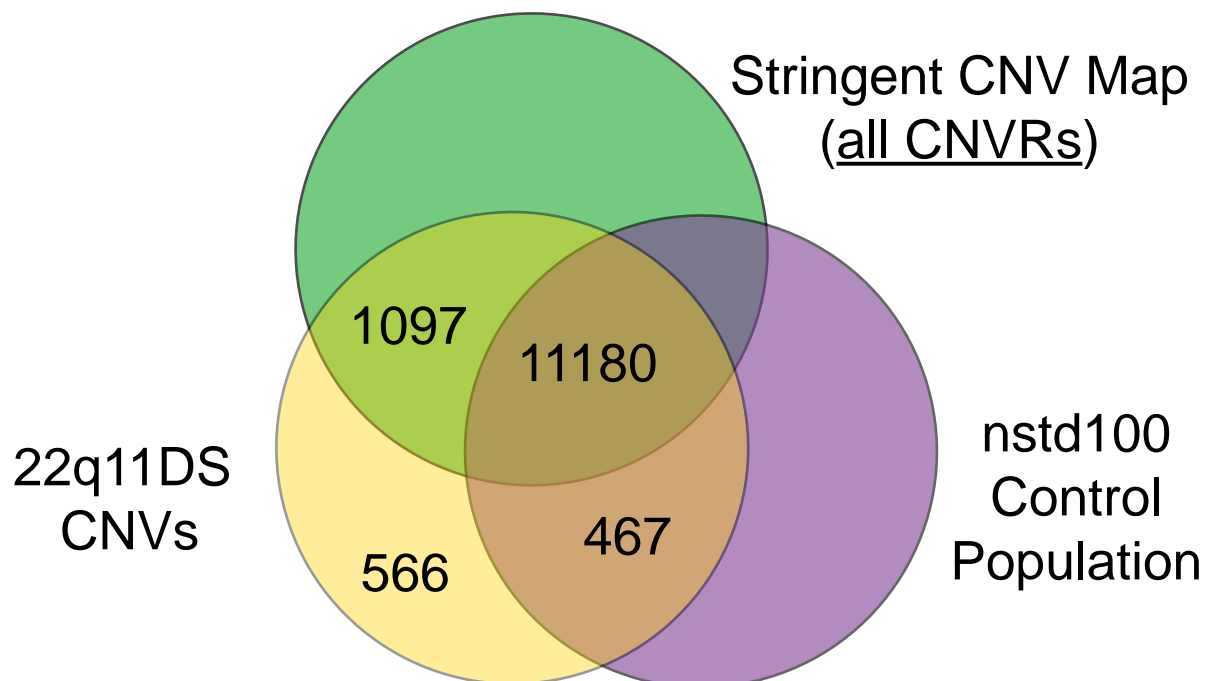

# Figure S5

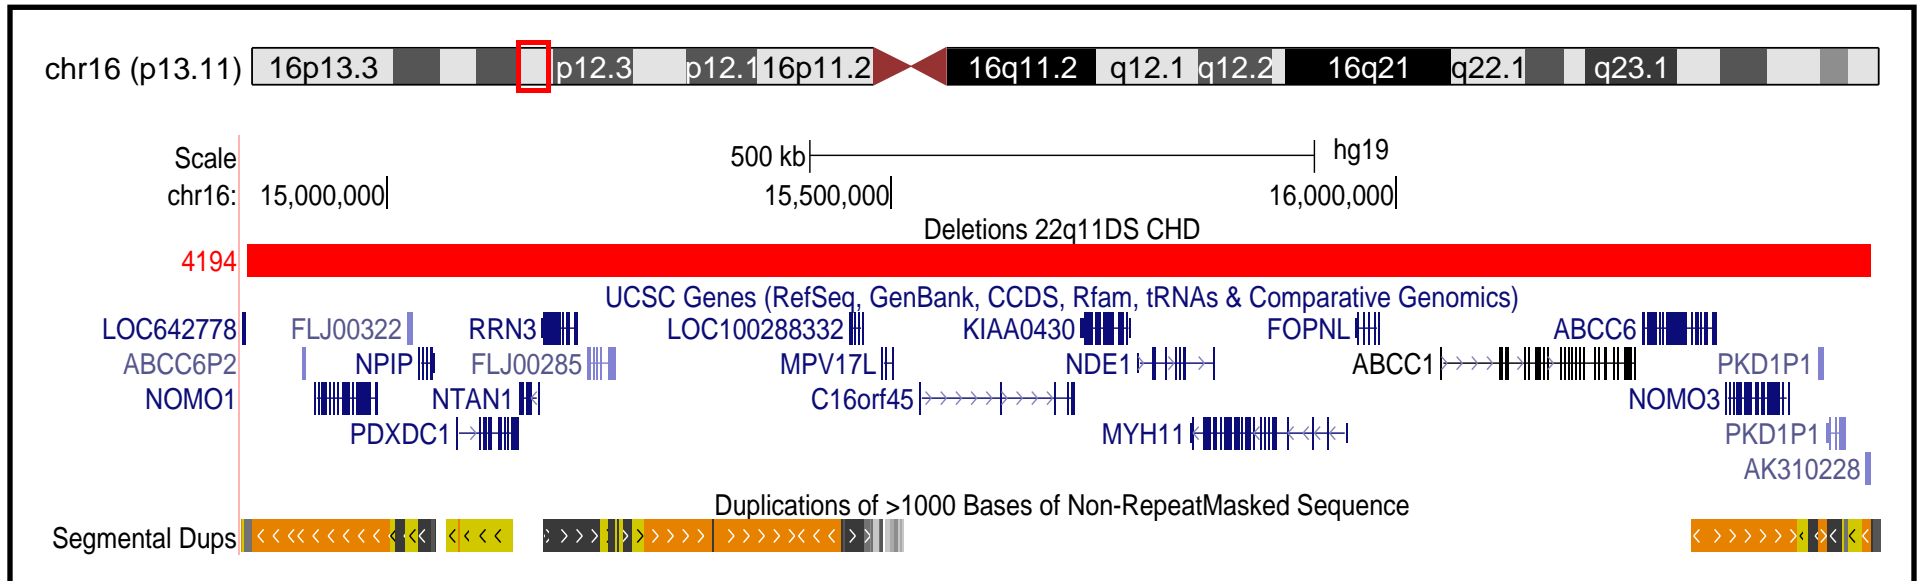

## MYH11 Deletion Validation by qPCR

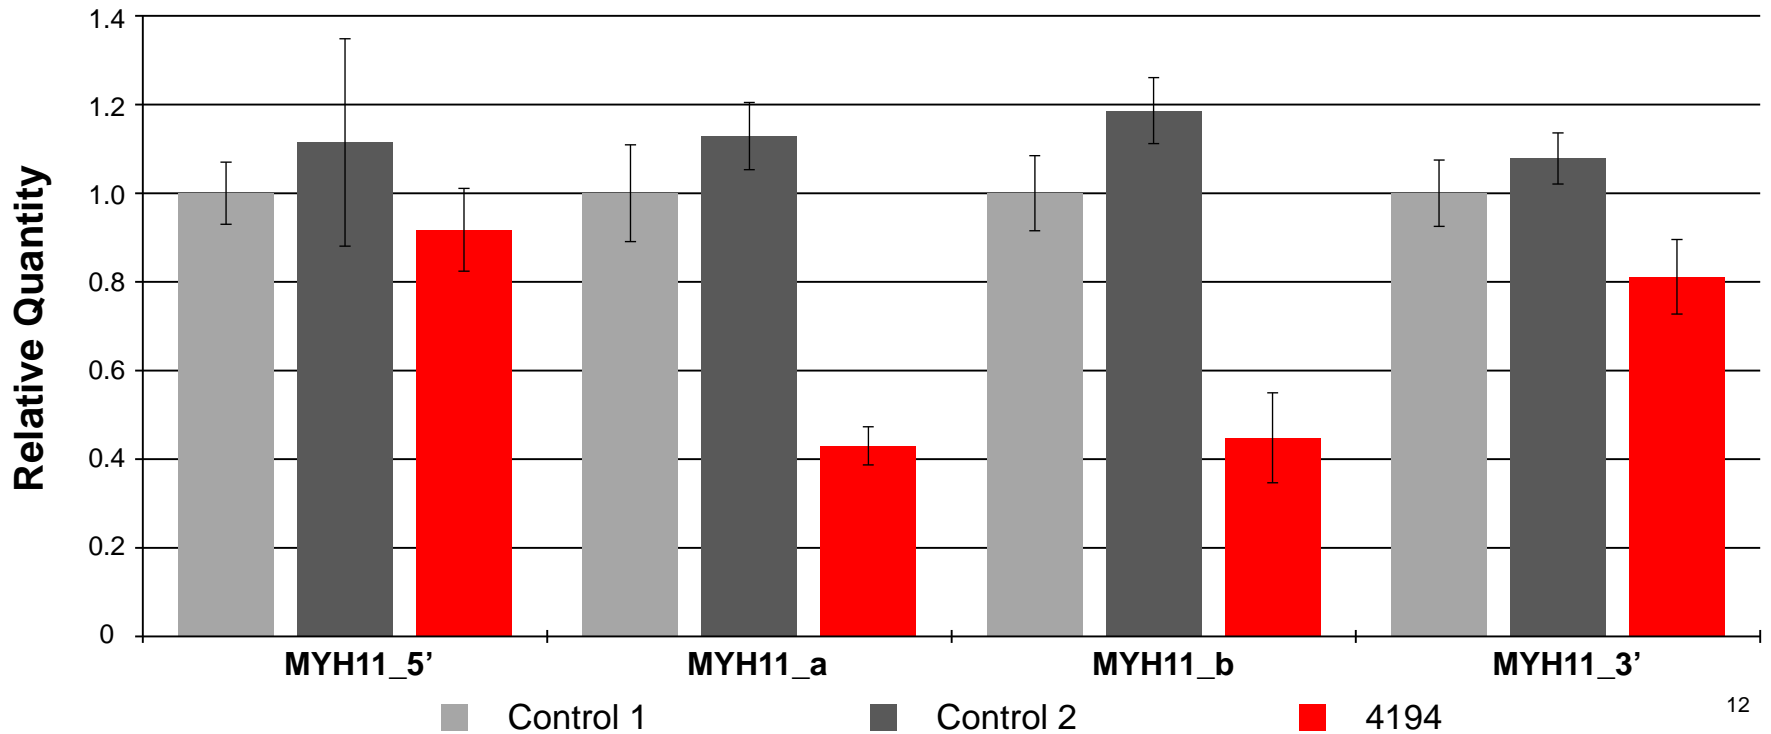

# Figure S6

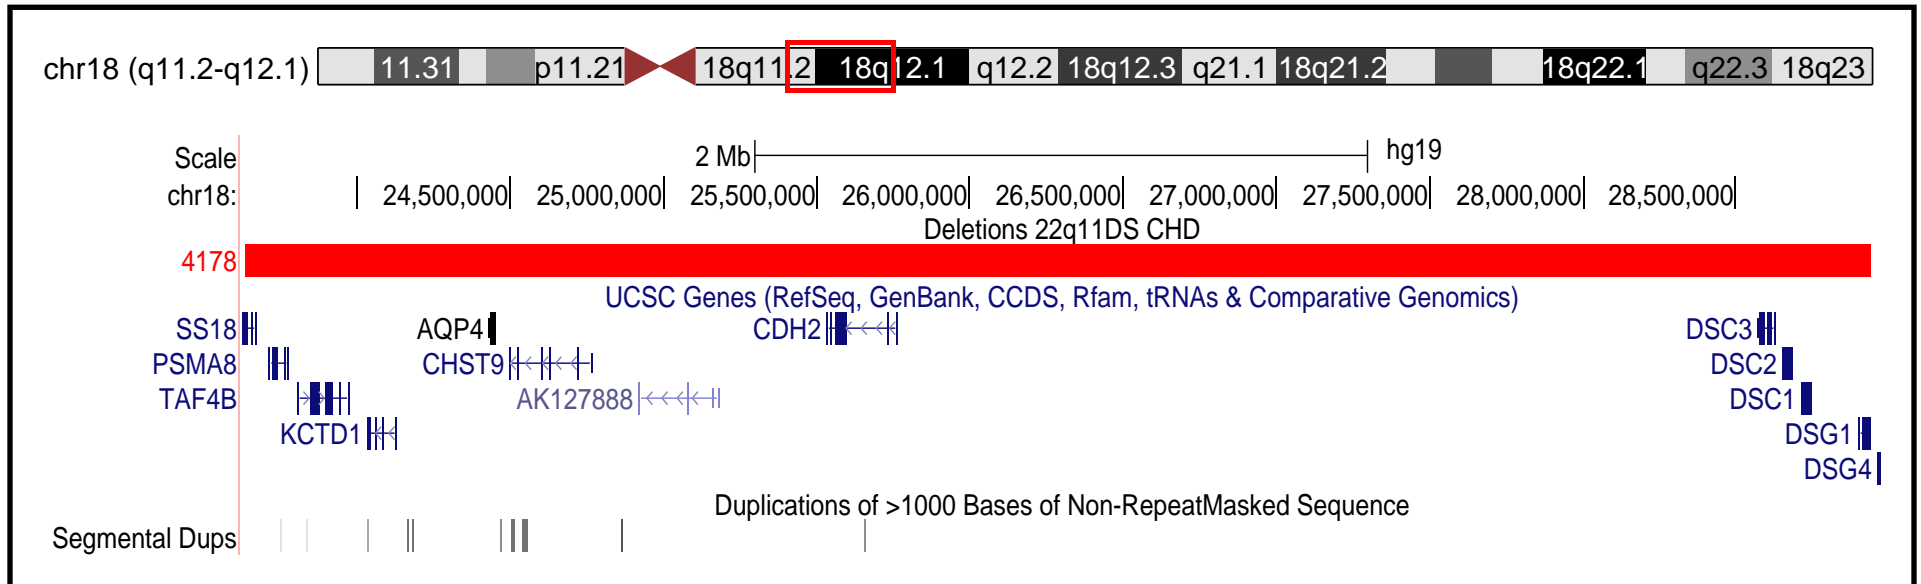

## CDH2 Deletion Validation by qPCR

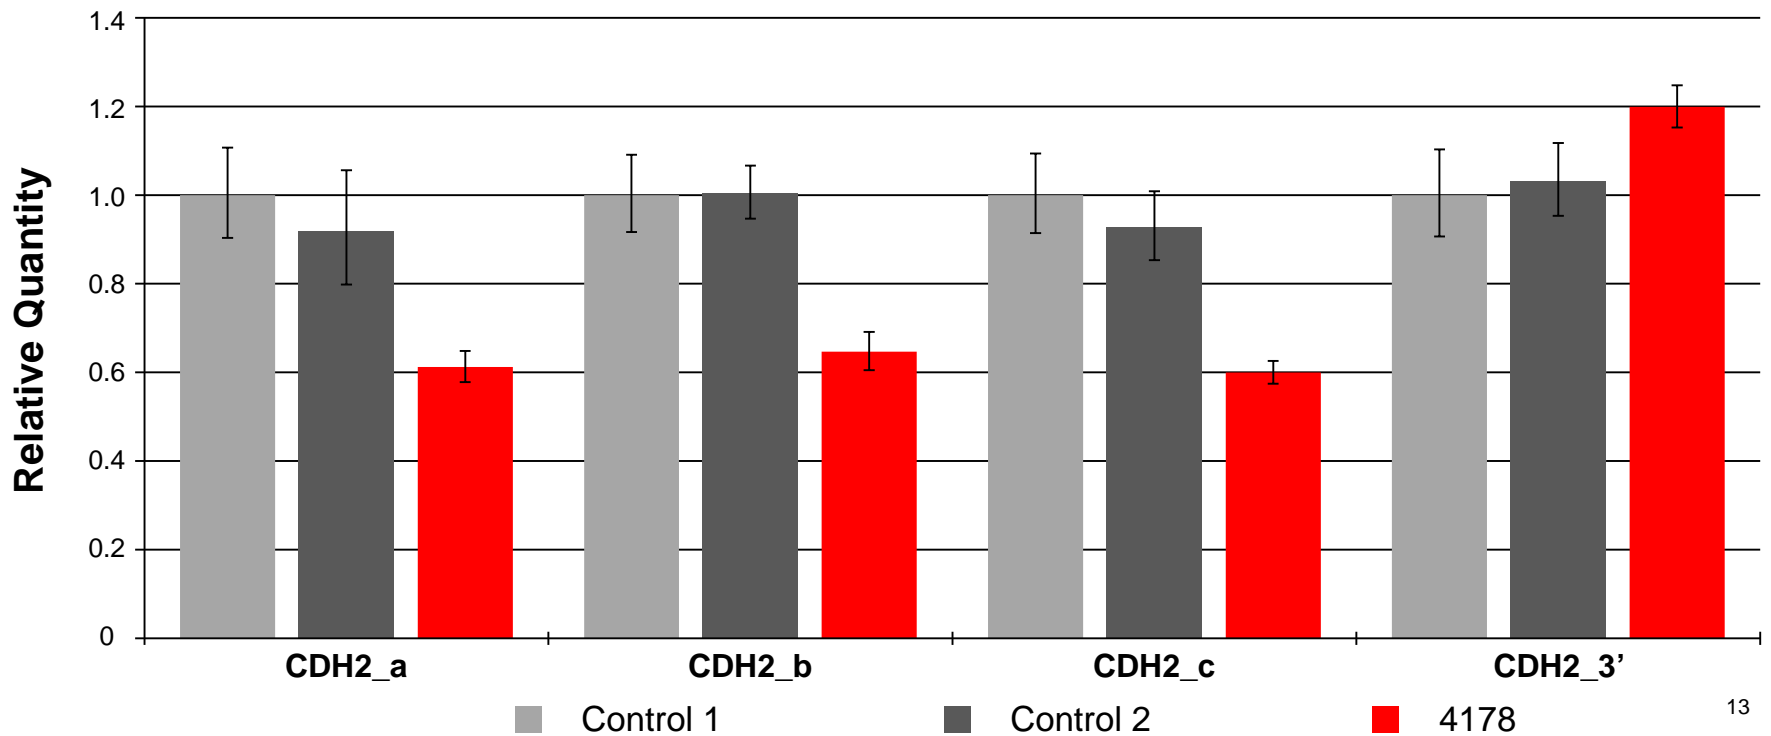

**Figure S7**

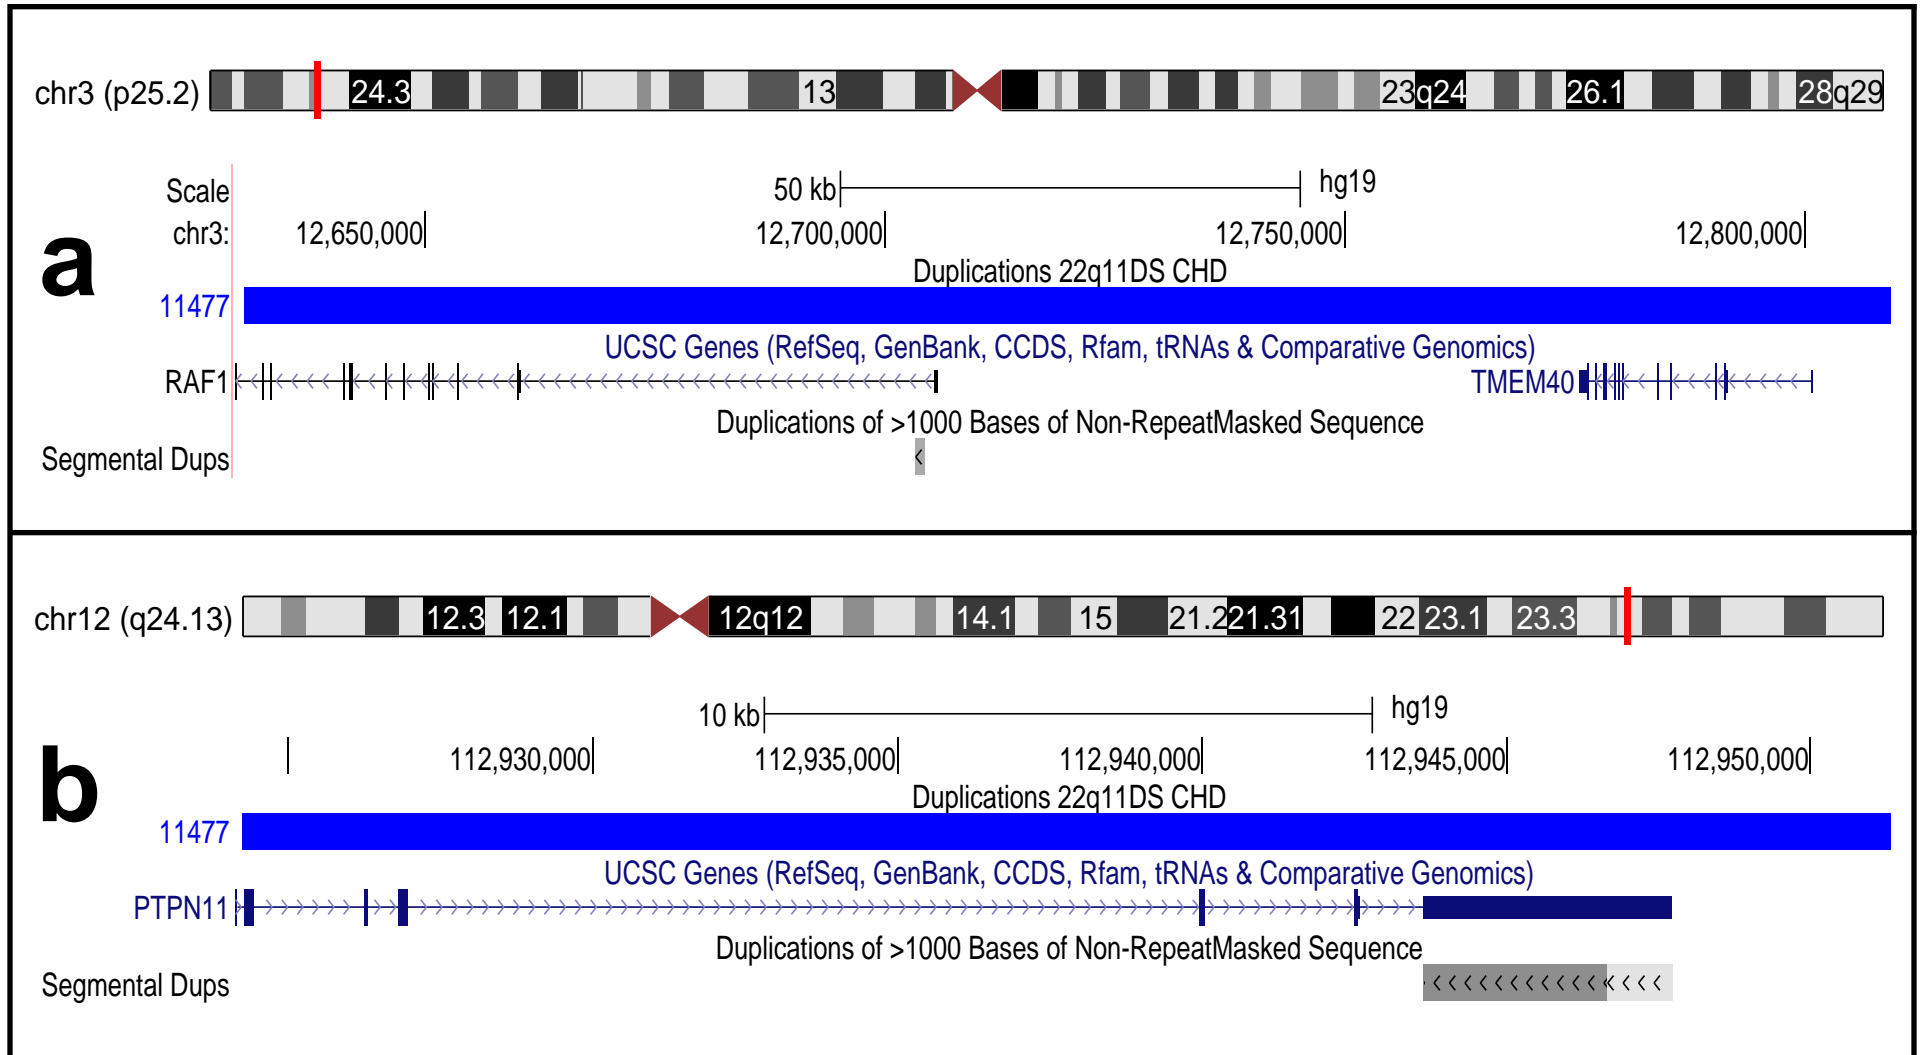

# Figure S8

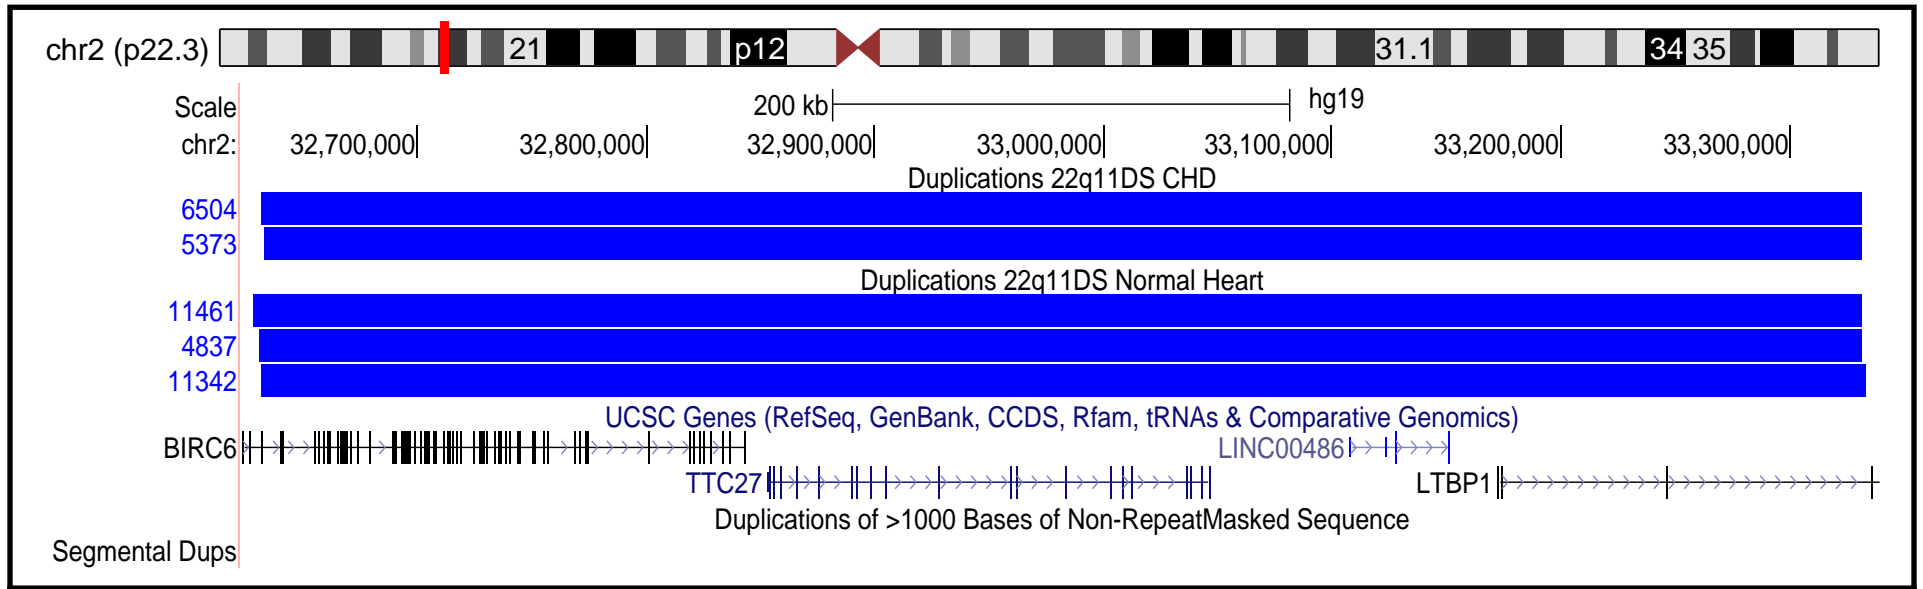

## LTBP1 Duplication Validation by qPCR

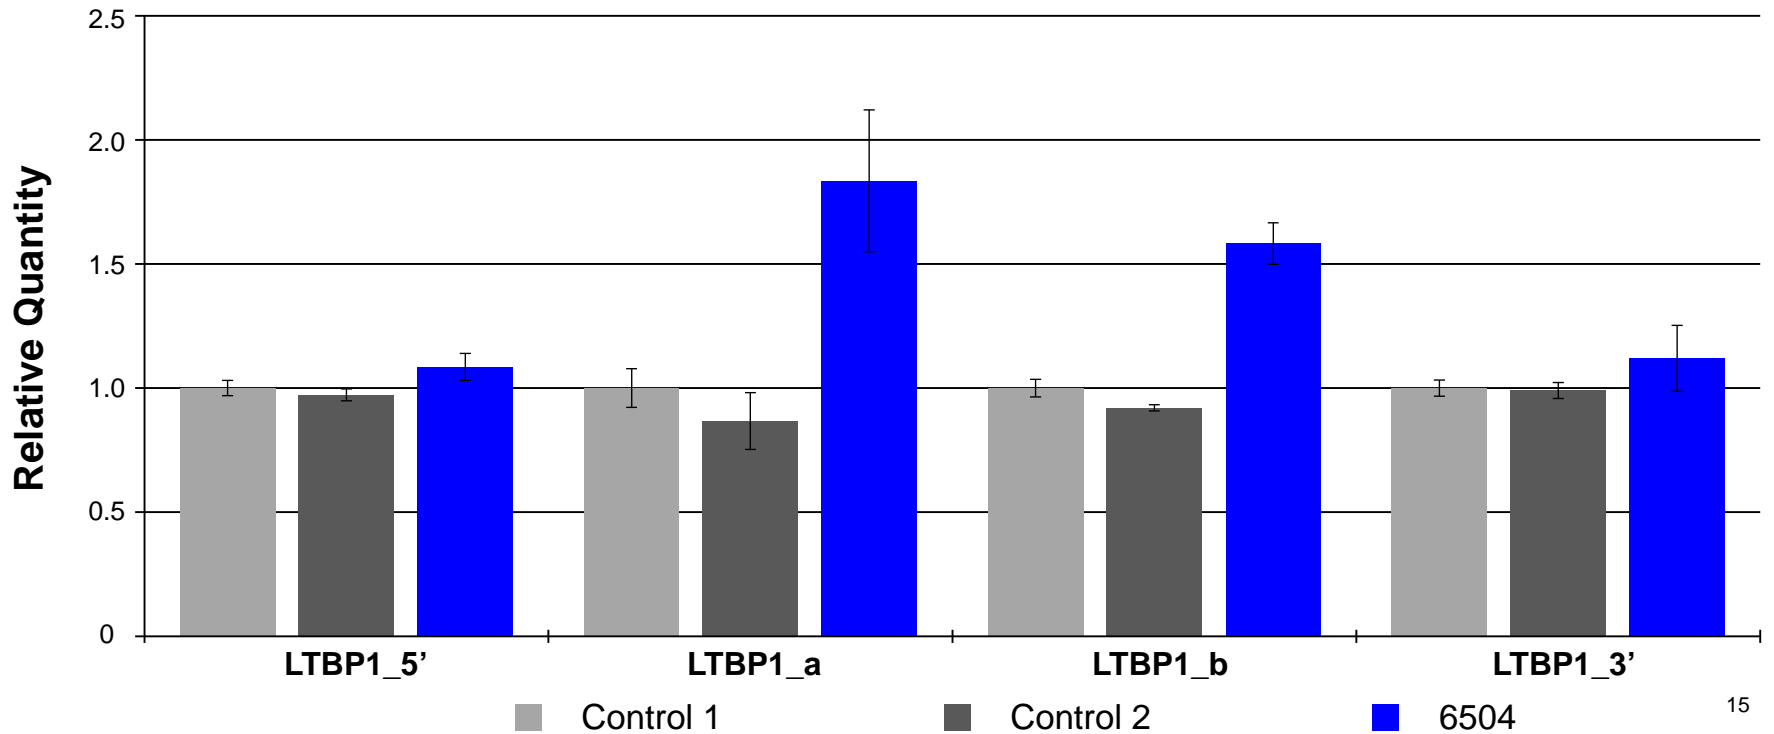

**Table S1: <0.1% Rare CNV burden****A: ALL Rare CNVs (<0.1%)**

|                                       | CHD    | No CHD | pValue            |
|---------------------------------------|--------|--------|-------------------|
| # of subjects with Rare CNVs          | 586    | 330    | 0.57 <sup>1</sup> |
| % with Rare CNVs                      | 96.54% | 97.35% |                   |
| Mean # of Rare CNVs per subject       | 3.98   | 3.94   | 0.94 <sup>2</sup> |
| ±StdDev                               | ±2.53  | ±2.37  |                   |
| Mean Rare CNV length (kb) per subject | 56.09  | 56.78  | 0.63 <sup>2</sup> |
| ±StdDev (kb)                          | ±88.66 | ±89.24 |                   |
| # with ≥1 Rare CNV ≥500 kb            | 44     | 24     | 1.00 <sup>1</sup> |

**B: Rare Deletions (<0.1%)**

|                                       | CHD    | No CHD | pValue            |
|---------------------------------------|--------|--------|-------------------|
| # of subjects with Rare CNVs          | 577    | 321    | 0.88 <sup>1</sup> |
| % with Rare CNVs                      | 95.06% | 94.69% |                   |
| Mean # of Rare CNVs per subject       | 3.46   | 3.48   | 0.52 <sup>2</sup> |
| ±StdDev                               | ±2.37  | ±2.17  |                   |
| Mean Rare CNV length (kb) per subject | 31.56  | 34.52  | 0.78 <sup>2</sup> |
| ±StdDev (kb)                          | ±55.41 | ±68.42 |                   |
| # with ≥1 Rare CNV ≥500 kb            | 6      | 8      | 0.16 <sup>1</sup> |

**C: Rare Duplications (<0.1%)**

|                                       | CHD     | No CHD  | pValue            |
|---------------------------------------|---------|---------|-------------------|
| # of subjects with Rare CNVs          | 224     | 116     | 0.44 <sup>1</sup> |
| % with Rare CNVs                      | 36.90%  | 34.22%  |                   |
| Mean # of Rare CNVs per subject       | 0.52    | 0.47    | 0.42 <sup>2</sup> |
| ±StdDev                               | ±0.79   | ±0.76   |                   |
| Mean Rare CNV length (kb) per subject | 90.11   | 67.10   | 0.33 <sup>2</sup> |
| ±StdDev (kb)                          | ±221.43 | ±152.17 |                   |
| # with ≥1 Rare CNV ≥500 kb            | 38      | 16      | 0.38 <sup>1</sup> |

CHD n=607; no CHD n=339

<sup>1</sup>two-tailed Fisher's exact test<sup>2</sup>Wilcoxon Rank Sum



**Table S2: 22q11DS CNVs outside Inclusive CNV map: by CN type \***

|                     |              | CNVs outside Inclusive CNV map |              | outside Inclusive CNV map & RARE (<1.0%) |                |                 |
|---------------------|--------------|--------------------------------|--------------|------------------------------------------|----------------|-----------------|
|                     |              | #                              | % (of total) | #                                        | % (of outside) | % (of all Rare) |
| <b>All CNVs</b>     | Cohort Total | 1456                           | 10.94%       | 1338                                     | 91.90%         | 18.54%          |
|                     | Cases        | 944                            | 10.95%       | 870                                      | 92.16%         | 18.73%          |
|                     | Controls     | 512                            | 10.91%       | 468                                      | 91.41%         | 18.20%          |
| <b>Deletions</b>    | Cohort Total | 905                            | 7.48%        | 862                                      | 95.25%         | 13.28%          |
|                     | Cases        | 588                            | 7.52%        | 558                                      | 94.90%         | 13.39%          |
|                     | Controls     | 317                            | 7.42%        | 304                                      | 95.90%         | 13.09%          |
| <b>Duplications</b> | Cohort Total | 551                            | 45.35%       | 476                                      | 86.39%         | 65.38%          |
|                     | Cases        | 356                            | 44.78%       | 312                                      | 87.64%         | 65.14%          |
|                     | Controls     | 195                            | 46.43%       | 164                                      | 84.10%         | 65.86%          |

\* CNVR gains & CNVR losses analyzed separately

**Table S3: 22q11DS CNVs outside Inclusive CNV map: all CNVRs ^**

|                     |              | CNVs outside Inclusive CNV map |              | outside Inclusive CNV map & RARE (<1.0%) |                |                 |
|---------------------|--------------|--------------------------------|--------------|------------------------------------------|----------------|-----------------|
|                     |              | #                              | % (of total) | #                                        | % (of outside) | % (of all Rare) |
| <b>All CNVs</b>     | Cohort Total | 1135                           | 8.53%        | 1042                                     | 91.81%         | 14.44%          |
|                     | Cases        | 724                            | 8.40%        | 667                                      | 92.13%         | 14.36%          |
|                     | Controls     | 411                            | 8.76%        | 375                                      | 91.24%         | 14.59%          |
| <b>Deletions</b>    | Cohort Total | 879                            | 7.27%        | 836                                      | 95.11%         | 12.88%          |
|                     | Cases        | 570                            | 7.29%        | 540                                      | 94.74%         | 12.96%          |
|                     | Controls     | 309                            | 7.23%        | 296                                      | 95.79%         | 12.75%          |
| <b>Duplications</b> | Cohort Total | 256                            | 21.07%       | 206                                      | 80.47%         | 28.30%          |
|                     | Cases        | 154                            | 19.37%       | 127                                      | 82.47%         | 26.51%          |
|                     | Controls     | 102                            | 24.29%       | 79                                       | 77.45%         | 31.73%          |

^ CNVR gains & CNVR losses combined

**Table S4: 22q11DS CNVs outside Stringent CNV map: by CN type \***

|                     |              | CNVs outside Stringent CNV map |              | outside Stringent CNV map & RARE (<1.0%) |                |                 |
|---------------------|--------------|--------------------------------|--------------|------------------------------------------|----------------|-----------------|
|                     |              | #                              | % (of total) | #                                        | % (of outside) | % (of all Rare) |
| <b>All CNVs</b>     | Cohort Total | 1948                           | 14.64%       | 1791                                     | 91.94%         | 24.82%          |
|                     | Cases        | 1244                           | 14.43%       | 1150                                     | 92.44%         | 24.75%          |
|                     | Controls     | 704                            | 15.01%       | 641                                      | 91.05%         | 24.93%          |
| <b>Deletions</b>    | Cohort Total | 1279                           | 10.57%       | 1225                                     | 95.78%         | 18.88%          |
|                     | Cases        | 814                            | 10.40%       | 776                                      | 95.33%         | 18.62%          |
|                     | Controls     | 465                            | 10.89%       | 449                                      | 96.56%         | 19.34%          |
| <b>Duplications</b> | Cohort Total | 669                            | 55.06%       | 566                                      | 84.60%         | 77.75%          |
|                     | Cases        | 430                            | 54.09%       | 374                                      | 86.98%         | 78.08%          |
|                     | Controls     | 239                            | 56.90%       | 192                                      | 80.33%         | 77.11%          |

\* CNVR gains & CNVR losses analyzed separately

**Table S5: 22q11DS CNVs outside Stringent CNV map: all CNVRs ^**

|                     |              | CNVs outside Stringent CNV map |              | outside Stringent CNV map & RARE (<1.0%) |                |                 |
|---------------------|--------------|--------------------------------|--------------|------------------------------------------|----------------|-----------------|
|                     |              | #                              | % (of total) | #                                        | % (of outside) | % (of all Rare) |
| <b>All CNVs</b>     | Cohort Total | 1135                           | 8.53%        | 1042                                     | 91.81%         | 14.44%          |
|                     | Cases        | 724                            | 8.40%        | 667                                      | 92.13%         | 14.36%          |
|                     | Controls     | 411                            | 8.76%        | 375                                      | 91.24%         | 14.59%          |
| <b>Deletions</b>    | Cohort Total | 879                            | 7.27%        | 836                                      | 95.11%         | 12.88%          |
|                     | Cases        | 570                            | 7.29%        | 540                                      | 94.74%         | 12.96%          |
|                     | Controls     | 309                            | 7.23%        | 296                                      | 95.79%         | 12.75%          |
| <b>Duplications</b> | Cohort Total | 256                            | 21.07%       | 206                                      | 80.47%         | 28.30%          |
|                     | Cases        | 154                            | 19.37%       | 127                                      | 82.47%         | 26.51%          |
|                     | Controls     | 102                            | 24.29%       | 79                                       | 77.45%         | 31.73%          |

^ CNVR gains & CNVR losses combined

**Table S6: ultra Rare CNV burden: <1.0% and outside Inclusive map (by CN type)**

**A: ALL ultra Rare CNVs**

|                                       | <b>CHD</b> | <b>No CHD</b> | <b>pValue</b>     |
|---------------------------------------|------------|---------------|-------------------|
| # of subjects with Rare CNVs          | 446        | 244           | 0.65 <sup>1</sup> |
| % with Rare CNVs                      | 73.48%     | 71.98%        |                   |
| Mean # of Rare CNVs per subject       | 1.43       | 1.38          | 0.55 <sup>2</sup> |
| ±StdDev                               | ±1.30      | ±1.27         |                   |
| Mean Rare CNV length (kb) per subject | 60.69      | 47.71         | 0.08 <sup>2</sup> |
| ±StdDev (kb)                          | ±102.03    | ±75.76        |                   |
| # with ≥1 Rare CNV ≥500 kb            | 22         | 6             | 0.11 <sup>1</sup> |

**B: ultra Rare Deletions**

|                                       | <b>CHD</b> | <b>No CHD</b> | <b>pValue</b>     |
|---------------------------------------|------------|---------------|-------------------|
| # of subjects with Rare CNVs          | 347        | 196           | 0.89 <sup>1</sup> |
| % with Rare CNVs                      | 57.17%     | 57.82%        |                   |
| Mean # of Rare CNVs per subject       | 0.92       | 0.90          | 0.93 <sup>2</sup> |
| ±StdDev                               | ±1.09      | ±0.98         |                   |
| Mean Rare CNV length (kb) per subject | 22.60      | 20.37         | 0.83 <sup>2</sup> |
| ±StdDev (kb)                          | ±36.35     | ±30.24        |                   |
| # with ≥1 Rare CNV ≥500 kb            | 0          | 0             | 1.00 <sup>1</sup> |

**C: ultra Rare Duplications**

|                                       | <b>CHD</b> | <b>No CHD</b> | <b>pValue</b>     |
|---------------------------------------|------------|---------------|-------------------|
| # of subjects with Rare CNVs          | 224        | 119           | 0.62 <sup>1</sup> |
| % with Rare CNVs                      | 36.90%     | 35.10%        |                   |
| Mean # of Rare CNVs per subject       | 0.51       | 0.48          | 0.61 <sup>2</sup> |
| ±StdDev                               | ±0.78      | ±0.76         |                   |
| Mean Rare CNV length (kb) per subject | 63.44      | 42.35         | 0.35 <sup>2</sup> |
| ±StdDev (kb)                          | ±151.52    | ±85.52        |                   |
| # with ≥1 Rare CNV ≥500 kb            | 22         | 6             | 0.11 <sup>1</sup> |

CHD n=607; no CHD n=339

<sup>1</sup> two-tailed Fisher's exact test

<sup>2</sup> Wilcoxon Rank Sum

**Table S7: ultra Rare CNV burden: <1.0% and outside Inclusive map (all CNVRs combined)**

**A: ALL ultra Rare CNVs**

|                                       | <b>CHD</b> | <b>No CHD</b> | <b>pValue</b>     |
|---------------------------------------|------------|---------------|-------------------|
| # of subjects with Rare CNVs          | 393        | 216           | 0.78 <sup>1</sup> |
| % with Rare CNVs                      | 64.74%     | 63.72%        |                   |
| Mean # of Rare CNVs per subject       | 1.10       | 1.11          | 0.93 <sup>2</sup> |
| ±StdDev                               | ±1.13      | ±1.12         |                   |
| Mean Rare CNV length (kb) per subject | 29.28      | 25.82         | 0.47 <sup>2</sup> |
| ±StdDev (kb)                          | ±39.32     | ±35.44        |                   |
| # with ≥1 Rare CNV ≥500 kb            | 0          | 0             | 1.00 <sup>1</sup> |

**B: ultra Rare Deletions**

|                                       | <b>CHD</b> | <b>No CHD</b> | <b>pValue</b>     |
|---------------------------------------|------------|---------------|-------------------|
| # of subjects with Rare CNVs          | 338        | 192           | 0.79 <sup>1</sup> |
| % with Rare CNVs                      | 55.68%     | 56.64%        |                   |
| Mean # of Rare CNVs per subject       | 0.89       | 0.87          | 0.87 <sup>2</sup> |
| ±StdDev                               | ±1.07      | ±0.97         |                   |
| Mean Rare CNV length (kb) per subject | 21.74      | 18.68         | 0.80 <sup>2</sup> |
| ±StdDev (kb)                          | ±35.40     | ±26.39        |                   |
| # with ≥1 Rare CNV ≥500 kb            | 0          | 0             | 1.00 <sup>1</sup> |

**C: ultra Rare Duplications**

|                                       | <b>CHD</b> | <b>No CHD</b> | <b>pValue</b>     |
|---------------------------------------|------------|---------------|-------------------|
| # of subjects with Rare CNVs          | 110        | 66            | 0.60 <sup>1</sup> |
| % with Rare CNVs                      | 18.12%     | 19.47%        |                   |
| Mean # of Rare CNVs per subject       | 0.21       | 0.23          | 0.71 <sup>2</sup> |
| ±StdDev                               | ±0.47      | ±0.52         |                   |
| Mean Rare CNV length (kb) per subject | 13.38      | 13.31         | 0.81 <sup>2</sup> |
| ±StdDev (kb)                          | ±35.20     | ±36.43        |                   |
| # with ≥1 Rare CNV ≥500 kb            | 0          | 0             | 1.00 <sup>1</sup> |

CHD n=607; no CHD n=339

<sup>1</sup> two-tailed Fisher's exact test

<sup>2</sup> Wilcoxon Rank Sum

**Table S8: ultra Rare CNV burden: <1.0% and outside Stringent map (by CN type)****A: ALL ultra Rare CNVs**

|                                       | CHD    | No CHD | pValue            |
|---------------------------------------|--------|--------|-------------------|
| # of subjects with Rare CNVs          | 493    | 271    | 0.67 <sup>1</sup> |
| % with Rare CNVs                      | 81.22% | 79.94% |                   |
| Mean # of Rare CNVs per subject       | 1.89   | 1.89   | 0.90 <sup>2</sup> |
| ±StdDev                               | ±1.57  | ±1.56  |                   |
| Mean Rare CNV length (kb) per subject | 67.83  | 62.25  | 0.17 <sup>2</sup> |
| ±StdDev (kb)                          | ±99.52 | ±92.86 |                   |
| # with ≥1 Rare CNV ≥500 kb            | 29     | 15     | 0.87 <sup>1</sup> |

**B: ultra Rare Deletions**

|                                       | CHD    | No CHD | pValue            |
|---------------------------------------|--------|--------|-------------------|
| # of subjects with Rare CNVs          | 422    | 234    | 0.88 <sup>1</sup> |
| % with Rare CNVs                      | 69.52% | 69.03% |                   |
| Mean # of Rare CNVs per subject       | 1.28   | 1.32   | 0.56 <sup>2</sup> |
| ±StdDev                               | ±1.29  | ±1.26  |                   |
| Mean Rare CNV length (kb) per subject | 31.32  | 30.64  | 0.67 <sup>2</sup> |
| ±StdDev (kb)                          | ±43.72 | ±46.89 |                   |
| # with ≥1 Rare CNV ≥500 kb            | 1      | 3      | 0.13 <sup>1</sup> |

**C: ultra Rare Duplications**

|                                       | CHD     | No CHD  | pValue            |
|---------------------------------------|---------|---------|-------------------|
| # of subjects with Rare CNVs          | 254     | 132     | 0.41 <sup>1</sup> |
| % with Rare CNVs                      | 41.85%  | 38.94%  |                   |
| Mean # of Rare CNVs per subject       | 0.62    | 0.57    | 0.42 <sup>2</sup> |
| ±StdDev                               | ±0.86   | ±0.84   |                   |
| Mean Rare CNV length (kb) per subject | 74.18   | 57.71   | 0.21 <sup>2</sup> |
| ±StdDev (kb)                          | ±156.43 | ±125.54 |                   |
| # with ≥1 Rare CNV ≥500 kb            | 28      | 12      | 0.50 <sup>1</sup> |

CHD n=607; no CHD n=339

<sup>1</sup>two-tailed Fisher's exact test<sup>2</sup>Wilcoxon Rank Sum

**Table S9: ultra Rare CNV burden: <1.0% and outside Stringent map (all CNVRs combined)**

**A: ALL ultra Rare CNVs**

|                                       | <b>CHD</b> | <b>No CHD</b> | <b>pValue</b>     |
|---------------------------------------|------------|---------------|-------------------|
| # of subjects with Rare CNVs          | 468        | 258           | 0.75 <sup>1</sup> |
| % with Rare CNVs                      | 77.10%     | 76.11%        |                   |
| Mean # of Rare CNVs per subject       | 1.61       | 1.64          | 0.94 <sup>2</sup> |
| ±StdDev                               | ±1.39      | ±1.42         |                   |
| Mean Rare CNV length (kb) per subject | 41.06      | 39.73         | 0.39 <sup>2</sup> |
| ±StdDev (kb)                          | ±47.15     | ±51.26        |                   |
| # with ≥1 Rare CNV ≥500 kb            | 0          | 2             | 0.13 <sup>1</sup> |

**B: ultra Rare Deletions**

|                                       | <b>CHD</b> | <b>No CHD</b> | <b>pValue</b>     |
|---------------------------------------|------------|---------------|-------------------|
| # of subjects with Rare CNVs          | 422        | 234           | 0.88 <sup>1</sup> |
| % with Rare CNVs                      | 69.52%     | 69.03%        |                   |
| Mean # of Rare CNVs per subject       | 1.26       | 1.31          | 0.56 <sup>2</sup> |
| ±StdDev                               | ±1.26      | ±1.25         |                   |
| Mean Rare CNV length (kb) per subject | 30.96      | 29.91         | 0.63 <sup>2</sup> |
| ±StdDev (kb)                          | ±42.25     | ±44.65        |                   |
| # with ≥1 Rare CNV ≥500 kb            | 0          | 2             | 0.13 <sup>1</sup> |

**C: ultra Rare Duplications**

|                                       | <b>CHD</b> | <b>No CHD</b> | <b>pValue</b>     |
|---------------------------------------|------------|---------------|-------------------|
| # of subjects with Rare CNVs          | 163        | 91            | 1.00 <sup>1</sup> |
| % with Rare CNVs                      | 26.85%     | 26.84%        |                   |
| Mean # of Rare CNVs per subject       | 0.35       | 0.33          | 0.95 <sup>2</sup> |
| ±StdDev                               | ±0.64      | ±0.60         |                   |
| Mean Rare CNV length (kb) per subject | 26.15      | 21.99         | 0.80 <sup>2</sup> |
| ±StdDev (kb)                          | ±60.45     | ±50.47        |                   |
| # with ≥1 Rare CNV ≥500 kb            | 0          | 0             | 1.00 <sup>1</sup> |

CHD n=607; no CHD n=339

<sup>1</sup> two-tailed Fisher's exact test

<sup>2</sup> Wilcoxon Rank Sum

**Table S10: Validated CNVs (GRCh37/hg19 genome build)**

| Sample | Phenotype | Chr | Start (bp)  | End (bp)    | Size      | CNV Type    | # of Probes | Freq in nstd100 Controls | Inherited  | Gene(s) of Interest    |
|--------|-----------|-----|-------------|-------------|-----------|-------------|-------------|--------------------------|------------|------------------------|
| 3935   | CHD       | 9   | 80,063,136  | 80,086,725  | 23,589    | Deletion    | 23          | 0.009%                   | Yes        | <i>GNA14</i>           |
| 3935   | CHD       | 17  | 34,816,256  | 36,295,000  | 1,478,744 | Duplication | 996         | 0.009%                   | Yes        | 17q12                  |
| 4160   | CHD       | 3   | 7,617,670   | 8,156,424   | 538,754   | Duplication | 503         | 0.000%                   | Not tested | <i>GRM7</i>            |
| 4165   | CHD       | 21  | 18,660,571  | 19,220,317  | 559,746   | Duplication | 374         | 0.027%                   | Not tested | <i>CXADR</i>           |
| 4178   | CHD       | 18  | 23,640,045  | 28,940,607  | 5,300,562 | Deletion    | 3360        | 0.000%                   | Not tested | <i>CDH2</i>            |
| 4194   | CHD       | 16  | 14,861,832  | 16,470,166  | 1,608,334 | Deletion    | 679         | 0.053%                   | Yes        | <i>MYH11</i>           |
| 4212   | No CHD    | 9   | 9,798,243   | 9,822,054   | 23,811    | Deletion    | 57          | 0.320%                   | Yes        | <i>PTPRD</i>           |
| 4251   | No CHD    | 9   | 9,847,865   | 9,964,989   | 117,124   | Deletion    | 144         | 0.044%                   | Yes        | <i>PTPRD</i>           |
| 5387   | No CHD    | 9   | 8,748,942   | 8,809,925   | 60,983    | Deletion    | 61          | 0.009%                   | Not tested | <i>PTPRD</i>           |
| 5402   | CHD       | 13  | 110,592,548 | 111,187,895 | 595,347   | Duplication | 570         | 0.009%                   | Not tested | <i>COL4A1</i>          |
| 5442   | CHD       | 21  | 35,722,995  | 35,903,942  | 180,947   | Duplication | 109         | 0.187%                   | Yes        | <i>RCAN1</i>           |
| 5456   | No CHD    | 10  | 79,250,577  | 79,367,542  | 116,965   | Deletion    | 98          | 0.000%                   | Not tested | <i>KCNMA1</i>          |
| 5471   | CHD       | 2   | 27,263,122  | 27,650,213  | 387,091   | Duplication | 158         | 0.000%                   | Not tested | <i>EMILIN1, TRIM54</i> |
| 5482   | CHD       | 17  | 72,629,123  | 73,410,780  | 781,657   | Duplication | 382         | 0.000%                   | Not tested | <i>GRB2</i>            |
| 5496   | No CHD    | 14  | 73,018,692  | 73,186,471  | 167,779   | Duplication | 125         | 0.000%                   | Not tested | <i>DPF3</i>            |
| 6501   | CHD       | 5   | 179,615,422 | 179,877,247 | 261,825   | Duplication | 175         | 0.018%                   | Not tested | <i>MAPK9</i>           |
| 6501   | CHD       | 16  | 82,714,047  | 82,764,168  | 50,121    | Deletion    | 47          | 0.018%                   | Not tested | <i>CDH13</i>           |
| 6502   | CHD       | 14  | 64,034,429  | 65,013,538  | 979,109   | Duplication | 184         | 0.000%                   | Not tested | <i>MTHFD1</i>          |
| 6504   | CHD       | 2   | 32,631,641  | 33,331,779  | 700,138   | Duplication | 453         | 0.240%                   | Not tested | <i>LTBP1</i>           |
| 6516   | CHD       | 9   | 119,413,509 | 119,659,873 | 246,364   | Deletion    | 267         | 0.018%                   | Not tested | <i>ASTN2;TRIM32</i>    |
| 6700   | CHD       | 16  | 83,308,001  | 83,349,855  | 41,854    | Duplication | 59          | 0.053%                   | Yes        | <i>CDH13</i>           |
| 6963   | CHD       | 21  | 18,735,222  | 19,133,564  | 398,342   | Duplication | 295         | 0.027%                   | Not tested | <i>CXADR</i>           |
| 7462   | CHD       | 1   | 228,799,656 | 228,954,712 | 155,056   | Duplication | 86          | 0.009%                   | Not tested | <i>RHOA</i>            |
| 7542   | No CHD    | 10  | 53,376,285  | 53,404,882  | 28,597    | Deletion    | 18          | 0.009%                   | Yes        | <i>PRKG1</i>           |

**Table S11: Mammalian Phenotype - All rare CNVs (none are significant - top 25 are shown)**

| MP ID      | MP Term Description                        | CHD | No CHD | p Value | FDR |
|------------|--------------------------------------------|-----|--------|---------|-----|
| MP:0003366 | abnormal circulating glucocorticoid level  | 17  | 0      | 0.00059 | 1   |
| MP:0003963 | abnormal corticosterone level              | 17  | 0      | 0.00059 | 1   |
| MP:0005345 | abnormal circulating corticosterone level  | 17  | 0      | 0.00059 | 1   |
| MP:0005437 | abnormal glycogen level                    | 28  | 3      | 0.00177 | 1   |
| MP:0005438 | abnormal glycogen homeostasis              | 28  | 3      | 0.00177 | 1   |
| MP:0001186 | pigmentation phenotype                     | 27  | 3      | 0.00172 | 1   |
| MP:0005559 | increased circulating glucose level        | 25  | 3      | 0.00430 | 1   |
| MP:0001944 | abnormal pancreas morphology               | 20  | 2      | 0.00638 | 1   |
| MP:0005291 | abnormal glucose tolerance                 | 23  | 3      | 0.00689 | 1   |
| MP:0001560 | abnormal circulating insulin level         | 26  | 4      | 0.01056 | 1   |
| MP:0005440 | increased glycogen level                   | 16  | 1      | 0.00876 | 1   |
| MP:0000559 | abnormal femur morphology                  | 22  | 3      | 0.01060 | 1   |
| MP:0003856 | abnormal hindlimb stylopod morphology      | 22  | 3      | 0.01060 | 1   |
| MP:0004686 | decreased length of long bones             | 22  | 3      | 0.01060 | 1   |
| MP:0000062 | increased bone mineral density             | 11  | 0      | 0.00968 | 1   |
| MP:0002665 | decreased circulating corticosterone level | 11  | 0      | 0.00968 | 1   |
| MP:0003368 | decreased circulating glucocorticoid level | 11  | 0      | 0.00968 | 1   |
| MP:0005598 | decreased ventricle muscle contractility   | 11  | 0      | 0.00968 | 1   |
| MP:0003109 | short femur                                | 18  | 2      | 0.01642 | 1   |
| MP:0002106 | abnormal muscle physiology                 | 138 | 55     | 0.01843 | 1   |
| MP:0001194 | dermatitis                                 | 10  | 0      | 0.01699 | 1   |
| MP:0003383 | abnormal gluconeogenesis                   | 14  | 1      | 0.01485 | 1   |
| MP:0005293 | impaired glucose tolerance                 | 14  | 1      | 0.01485 | 1   |
| MP:0000849 | abnormal cerebellum morphology             | 102 | 38     | 0.02181 | 1   |
| MP:0002551 | abnormal blood coagulation                 | 26  | 5      | 0.02142 | 1   |



**Table S12: Mammalian Phenotype - rare Deletions (none are significant - top 25 are shown)**

| MP ID      | MP Term Description                      | CHD | No CHD | p Value | FDR |
|------------|------------------------------------------|-----|--------|---------|-----|
| MP:0000003 | abnormal adipose tissue morphology       | 33  | 15     | 0.54010 | 1   |
| MP:0000008 | increased white adipose tissue amount    | 1   | 0      | 1       | 1   |
| MP:0000010 | abnormal abdominal fat pad morphology    | 6   | 2      | 0.71851 | 1   |
| MP:0000015 | abnormal ear pigmentation                | 1   | 0      | 1       | 1   |
| MP:0000018 | small ears                               | 1   | 0      | 1       | 1   |
| MP:0000019 | thick ears                               | 1   | 0      | 1       | 1   |
| MP:0000022 | abnormal ear shape                       | 1   | 0      | 1       | 1   |
| MP:0000023 | abnormal ear distance/ position          | 1   | 0      | 1       | 1   |
| MP:0000024 | lowered ear position                     | 1   | 0      | 1       | 1   |
| MP:0000026 | abnormal inner ear morphology            | 11  | 8      | 0.63085 | 1   |
| MP:0000031 | abnormal cochlea morphology              | 11  | 7      | 0.80684 | 1   |
| MP:0000032 | cochlear degeneration                    | 4   | 2      | 1       | 1   |
| MP:0000034 | abnormal inner ear vestibule morphology  | 2   | 1      | 1       | 1   |
| MP:0000035 | abnormal membranous labyrinth morphology | 11  | 8      | 0.63085 | 1   |
| MP:0000042 | abnormal organ of Corti morphology       | 11  | 7      | 0.80684 | 1   |
| MP:0000043 | organ of Corti degeneration              | 4   | 2      | 1       | 1   |
| MP:0000045 | abnormal hair cell morphology            | 9   | 4      | 0.77997 | 1   |
| MP:0000048 | abnormal stria vascularis morphology     | 2   | 1      | 1       | 1   |
| MP:0000049 | abnormal middle ear morphology           | 1   | 0      | 1       | 1   |
| MP:0000060 | delayed bone ossification                | 1   | 1      | 1       | 1   |
| MP:0000061 | fragile skeleton                         | 1   | 0      | 1       | 1   |
| MP:0000062 | increased bone mineral density           | 4   | 0      | 0.30302 | 1   |
| MP:0000063 | decreased bone mineral density           | 144 | 74     | 0.52067 | 1   |
| MP:0000065 | abnormal bone marrow cavity morphology   | 2   | 2      | 0.62080 | 1   |
| MP:0000069 | kyphoscoliosis                           | 0   | 1      | 0.35835 | 1   |

**Table S13: Mammalian Phenotype - rare Duplications (none are significant - top 25 are shown)**

| MP ID      | MP Term Description                       | CHD | No CHD | p Value | FDR     |
|------------|-------------------------------------------|-----|--------|---------|---------|
| MP:0002106 | abnormal muscle physiology                | 41  | 6      | 0.00048 | 0.81827 |
| MP:0000188 | abnormal circulating glucose level        | 36  | 5      | 0.00075 | 0.81827 |
| MP:0005620 | abnormal muscle contractility             | 21  | 1      | 0.00110 | 0.81827 |
| MP:0005406 | abnormal heart size                       | 28  | 3      | 0.00177 | 0.81827 |
| MP:0002078 | abnormal glucose homeostasis              | 46  | 9      | 0.00136 | 0.81827 |
| MP:0003953 | abnormal hormone level                    | 43  | 8      | 0.00149 | 0.81827 |
| MP:0005560 | decreased circulating glucose level       | 24  | 2      | 0.00147 | 0.81827 |
| MP:0000738 | impaired muscle contractility             | 20  | 1      | 0.00190 | 0.81827 |
| MP:0005418 | abnormal circulating hormone level        | 37  | 6      | 0.00172 | 0.81827 |
| MP:0002163 | abnormal gland morphology                 | 56  | 13     | 0.00171 | 0.81827 |
| MP:0004087 | abnormal muscle fiber morphology          | 23  | 2      | 0.00241 | 0.89450 |
| MP:0005379 | endocrine/exocrine gland phenotype        | 65  | 17     | 0.00249 | 0.89450 |
| MP:0004857 | abnormal heart weight                     | 18  | 1      | 0.00314 | 1       |
| MP:0000274 | enlarged heart                            | 24  | 3      | 0.00690 | 1       |
| MP:0001186 | pigmentation phenotype                    | 20  | 2      | 0.00638 | 1       |
| MP:0003921 | abnormal heart left ventricle morphology  | 20  | 2      | 0.00638 | 1       |
| MP:0005437 | abnormal glycogen level                   | 20  | 2      | 0.00638 | 1       |
| MP:0005438 | abnormal glycogen homeostasis             | 20  | 2      | 0.00638 | 1       |
| MP:0005332 | abnormal amino acid level                 | 12  | 0      | 0.00566 | 1       |
| MP:0002972 | abnormal cardiac muscle contractility     | 16  | 1      | 0.00876 | 1       |
| MP:0005140 | decreased cardiac muscle contractility    | 16  | 1      | 0.00876 | 1       |
| MP:0003795 | abnormal bone structure                   | 28  | 5      | 0.01489 | 1       |
| MP:0002102 | abnormal ear morphology                   | 22  | 3      | 0.01060 | 1       |
| MP:0003366 | abnormal circulating glucocorticoid level | 11  | 0      | 0.00968 | 1       |
| MP:0003963 | abnormal corticosterone level             | 11  | 0      | 0.00968 | 1       |

**Table S14: Gene Ontology - All rare CNVs (none are significant - top 25 are shown)**

| GO ID      | GO Term Description                                                 | GO Term Type       | CHD | No CHD | p Value | FDR |
|------------|---------------------------------------------------------------------|--------------------|-----|--------|---------|-----|
| GO:1901654 | response to ketone                                                  | biological process | 16  | 0      | 0.00101 | 1   |
| GO:1902532 | negative regulation of intracellular signal transduction            | biological process | 25  | 3      | 0.00430 | 1   |
| GO:0012506 | vesicle membrane                                                    | cellular component | 37  | 7      | 0.00368 | 1   |
| GO:0006091 | generation of precursor metabolites and energy                      | biological process | 28  | 4      | 0.00434 | 1   |
| GO:0044070 | regulation of anion transport                                       | biological process | 13  | 0      | 0.00588 | 1   |
| GO:0044433 | cytoplasmic vesicle part                                            | cellular component | 42  | 9      | 0.00630 | 1   |
| GO:0030659 | cytoplasmic vesicle membrane                                        | cellular component | 36  | 7      | 0.00538 | 1   |
| GO:0043687 | post-translational protein modification                             | biological process | 29  | 5      | 0.00974 | 1   |
| GO:0006487 | protein N-linked glycosylation                                      | biological process | 22  | 3      | 0.01060 | 1   |
| GO:0015081 | sodium ion transmembrane transporter activity                       | molecular function | 11  | 0      | 0.00968 | 1   |
| GO:0040012 | regulation of locomotion                                            | biological process | 106 | 39     | 0.01451 | 1   |
| GO:0040013 | negative regulation of locomotion                                   | biological process | 30  | 6      | 0.01314 | 1   |
| GO:0006691 | leukotriene metabolic process                                       | biological process | 10  | 0      | 0.01699 | 1   |
| GO:0051896 | regulation of protein kinase B signaling                            | biological process | 10  | 0      | 0.01699 | 1   |
| GO:0008238 | exopeptidase activity                                               | molecular function | 14  | 1      | 0.01485 | 1   |
| GO:0019318 | hexose metabolic process                                            | biological process | 14  | 1      | 0.01485 | 1   |
| GO:0051224 | negative regulation of protein transport                            | biological process | 14  | 1      | 0.01485 | 1   |
| GO:0030336 | negative regulation of cell migration                               | biological process | 26  | 5      | 0.02142 | 1   |
| GO:0051271 | negative regulation of cellular component movement                  | biological process | 26  | 5      | 0.02142 | 1   |
| GO:2000146 | negative regulation of cell motility                                | biological process | 26  | 5      | 0.02142 | 1   |
| GO:0030100 | regulation of endocytosis                                           | biological process | 39  | 10     | 0.02147 | 1   |
| GO:0008237 | metallopeptidase activity                                           | molecular function | 23  | 4      | 0.02371 | 1   |
| GO:0022412 | cellular process involved in reproduction in multicellular organism | biological process | 23  | 4      | 0.02371 | 1   |
| GO:0060627 | regulation of vesicle-mediated transport                            | biological process | 46  | 13     | 0.02445 | 1   |
| GO:0018196 | peptidyl-asparagine modification                                    | biological process | 20  | 3      | 0.02564 | 1   |

**Table S15: Gene Ontology - rare Deletions (none are significant - top 25 are shown)**

| GO ID      | GO Term Description                                      | GO Term Type       | CHD | No CHD | p Value | FDR |
|------------|----------------------------------------------------------|--------------------|-----|--------|---------|-----|
| GO:0030336 | negative regulation of cell migration                    | biological process | 17  | 1      | 0.00520 | 1   |
| GO:0051271 | negative regulation of cellular component movement       | biological process | 17  | 1      | 0.00520 | 1   |
| GO:2000146 | negative regulation of cell motility                     | biological process | 17  | 1      | 0.00520 | 1   |
| GO:0040013 | negative regulation of locomotion                        | biological process | 20  | 2      | 0.00638 | 1   |
| GO:1902532 | negative regulation of intracellular signal transduction | biological process | 16  | 1      | 0.00876 | 1   |
| GO:0006897 | endocytosis                                              | biological process | 18  | 2      | 0.01642 | 1   |
| GO:0043687 | post-translational protein modification                  | biological process | 18  | 2      | 0.01642 | 1   |
| GO:0040012 | regulation of locomotion                                 | biological process | 92  | 34     | 0.02805 | 1   |
| GO:0002685 | regulation of leukocyte migration                        | biological process | 9   | 0      | 0.03060 | 1   |
| GO:1901654 | response to ketone                                       | biological process | 9   | 0      | 0.03060 | 1   |
| GO:0030334 | regulation of cell migration                             | biological process | 90  | 34     | 0.04413 | 1   |
| GO:2000145 | regulation of cell motility                              | biological process | 90  | 34     | 0.04413 | 1   |
| GO:0031253 | cell projection membrane                                 | cellular component | 15  | 2      | 0.04084 | 1   |
| GO:0021987 | cerebral cortex development                              | biological process | 8   | 0      | 0.05630 | 1   |
| GO:0010721 | negative regulation of cell development                  | biological process | 11  | 1      | 0.06535 | 1   |
| GO:0051270 | regulation of cellular component movement                | biological process | 90  | 36     | 0.07276 | 1   |
| GO:0008238 | exopeptidase activity                                    | molecular function | 7   | 0      | 0.05426 | 1   |
| GO:0031396 | regulation of protein ubiquitination                     | biological process | 7   | 0      | 0.05426 | 1   |
| GO:0032355 | response to estradiol                                    | biological process | 7   | 0      | 0.05426 | 1   |
| GO:1901681 | sulfur compound binding                                  | molecular function | 7   | 0      | 0.05426 | 1   |
| GO:0008233 | peptidase activity                                       | molecular function | 31  | 9      | 0.09113 | 1   |
| GO:0070011 | peptidase activity, acting on L-amino acid peptides      | molecular function | 31  | 9      | 0.09113 | 1   |
| GO:0008237 | metallopeptidase activity                                | molecular function | 16  | 3      | 0.08896 | 1   |
| GO:0002221 | pattern recognition receptor signaling pathway           | biological process | 21  | 5      | 0.09593 | 1   |
| GO:0002758 | innate immune response-activating signal transduction    | biological process | 21  | 5      | 0.09593 | 1   |

**Table S16: Gene Ontology - rare Duplications (none are significant - top 25 are shown)**

| GO ID      | GO Term Description                                 | GO Term Type       | CHD | No CHD | p Value | FDR |
|------------|-----------------------------------------------------|--------------------|-----|--------|---------|-----|
| GO:0051051 | negative regulation of transport                    | biological process | 15  | 0      | 0.00177 | 1   |
| GO:0032880 | regulation of protein localization                  | biological process | 26  | 3      | 0.00270 | 1   |
| GO:0006091 | generation of precursor metabolites and energy      | biological process | 25  | 3      | 0.00430 | 1   |
| GO:0071705 | nitrogen compound transport                         | biological process | 25  | 3      | 0.00430 | 1   |
| GO:0007005 | mitochondrion organization                          | biological process | 13  | 0      | 0.00588 | 1   |
| GO:0044070 | regulation of anion transport                       | biological process | 12  | 0      | 0.00566 | 1   |
| GO:0070201 | regulation of establishment of protein localization | biological process | 23  | 3      | 0.00689 | 1   |
| GO:0005975 | carbohydrate metabolic process                      | biological process | 34  | 7      | 0.01163 | 1   |
| GO:0055114 | oxidation-reduction process                         | biological process | 34  | 7      | 0.01163 | 1   |
| GO:0032403 | protein complex binding                             | molecular function | 31  | 6      | 0.01322 | 1   |
| GO:0008283 | cell proliferation                                  | biological process | 28  | 5      | 0.01489 | 1   |
| GO:0051223 | regulation of protein transport                     | biological process | 22  | 3      | 0.01060 | 1   |
| GO:0030100 | regulation of endocytosis                           | biological process | 11  | 0      | 0.00968 | 1   |
| GO:0000166 | nucleotide binding                                  | molecular function | 72  | 23     | 0.01295 | 1   |
| GO:1901265 | nucleoside phosphate binding                        | molecular function | 72  | 23     | 0.01295 | 1   |
| GO:0009617 | response to bacterium                               | biological process | 15  | 1      | 0.01496 | 1   |
| GO:0060627 | regulation of vesicle-mediated transport            | biological process | 15  | 1      | 0.01496 | 1   |
| GO:0016477 | cell migration                                      | biological process | 33  | 7      | 0.01715 | 1   |
| GO:0032787 | monocarboxylic acid metabolic process               | biological process | 27  | 5      | 0.01448 | 1   |
| GO:0012506 | vesicle membrane                                    | cellular component | 24  | 4      | 0.01566 | 1   |
| GO:0051346 | negative regulation of hydrolase activity           | biological process | 10  | 0      | 0.01699 | 1   |
| GO:0033157 | regulation of intracellular protein transport       | biological process | 14  | 1      | 0.01485 | 1   |
| GO:0042742 | defense response to bacterium                       | biological process | 14  | 1      | 0.01485 | 1   |
| GO:0050863 | regulation of T cell activation                     | biological process | 14  | 1      | 0.01485 | 1   |
| GO:0044723 | single-organism carbohydrate metabolic process      | biological process | 29  | 6      | 0.01908 | 1   |

**Table S17: GSEA/MSigDB Analysis - All rare CNVs (none are significant - top 25 are shown)**

| MSigDB Gene Set Name                                                              | CHD | No CHD | p Value | FDR |
|-----------------------------------------------------------------------------------|-----|--------|---------|-----|
| REACTOME_IMMUNOREGULATORY_INTERACTIONS_BETWEEN_A_LYMPHOID_AND_A_NON_LYMPHOID_CELL | 9   | 0      | 0.03060 | 1   |
| REACTOME_ASPARAGINE_N_LINKED_GLYCOSYLATION                                        | 18  | 3      | 0.03906 | 1   |
| REACTOME_GOLGI_ASSOCIATED_VESICLE_BIOGENESIS                                      | 8   | 0      | 0.05630 | 1   |
| REACTOME_TRANS_GOLGI_NETWORK_VESICLE_BUDDING                                      | 8   | 0      | 0.05630 | 1   |
| KEGG_NEUROTROPHIN_SIGNALING_PATHWAY                                               | 25  | 6      | 0.05728 | 1   |
| KEGG_HUNTINGTONS_DISEASE                                                          | 17  | 3      | 0.05889 | 1   |
| REACTOME_MEMBRANE_TRAFFICKING                                                     | 11  | 1      | 0.06535 | 1   |
| REACTOME_METABOLISM_OF_MRNA                                                       | 11  | 1      | 0.06535 | 1   |
| REACTOME_METABOLISM_OF_RNA                                                        | 14  | 2      | 0.06397 | 1   |
| KEGG_FOCAL_ADHESION                                                               | 27  | 7      | 0.06844 | 1   |
| REACTOME_EGFR_DOWNREGULATION                                                      | 7   | 0      | 0.05426 | 1   |
| REACTOME_MHC_CLASS_II_ANTIGEN_PRESENTATION                                        | 7   | 0      | 0.05426 | 1   |
| KEGG_NOD_LIKE_RECEPTOR_SIGNALING_PATHWAY                                          | 19  | 4      | 0.07740 | 1   |
| REACTOME_NGF_SIGNALLING_VIA_TRKA_FROM_THE_PLASMA_MEMBRANE                         | 19  | 4      | 0.07740 | 1   |
| REACTOME_SIGNALLING_BY_NGF                                                        | 26  | 7      | 0.09533 | 1   |
| KEGG_PATHWAYS_IN_CANCER                                                           | 44  | 15     | 0.09328 | 1   |
| KEGG_INSULIN_SIGNALING_PATHWAY                                                    | 23  | 6      | 0.11420 | 1   |
| REACTOME_ADAPTIVE_IMMUNE_SYSTEM                                                   | 50  | 18     | 0.11478 | 1   |
| KEGG_ADIPOCYTOKINE_SIGNALING_PATHWAY                                              | 25  | 7      | 0.13205 | 1   |
| BIOCARTA_MTA3_PATHWAY                                                             | 6   | 0      | 0.09367 | 1   |
| REACTOME_LYSOSOME_VESICLE_BIOGENESIS                                              | 6   | 0      | 0.09367 | 1   |
| REACTOME_METABOLISM_OF_NUCLEOTIDES                                                | 6   | 0      | 0.09367 | 1   |
| REACTOME_AXON_GUIDANCE                                                            | 27  | 8      | 0.10955 | 1   |
| KEGG_GNRH_SIGNALING_PATHWAY                                                       | 22  | 6      | 0.11436 | 1   |
| REACTOME_RESPONSE_TO_ELEVATED_PLATELET_CYTOSOLIC_CA2                              | 9   | 1      | 0.10587 | 1   |

**Table S18: GSEA/MSigDB Analysis - rare Deletions (none are significant - top 25 are shown)**

| MSigDB Gene Set Name                           | CHD | No CHD | p Value | FDR |
|------------------------------------------------|-----|--------|---------|-----|
| REACTOME_DEVELOPMENTAL_BIOLOGY                 | 18  | 4      | 0.11349 | 1   |
| KEGG_CELL_ADHESION_MOLECULES_CAMS              | 15  | 3      | 0.13394 | 1   |
| KEGG_CALCIUM_SIGNALING_PATHWAY                 | 73  | 31     | 0.19393 | 1   |
| REACTOME_PI3K_EVENTS_IN_ERBB2_SIGNALING        | 66  | 28     | 0.21385 | 1   |
| REACTOME_SIGNALING_BY_ERBB2                    | 66  | 28     | 0.21385 | 1   |
| KEGG_GNRH_SIGNALING_PATHWAY                    | 15  | 4      | 0.22915 | 1   |
| KEGG_WNT_SIGNALING_PATHWAY                     | 15  | 4      | 0.22915 | 1   |
| REACTOME_PI3K_EVENTS_IN_ERBB4_SIGNALING        | 65  | 28     | 0.25531 | 1   |
| REACTOME_ASPARAGINE_N_LINKED_GLYCOSYLATION     | 10  | 2      | 0.22967 | 1   |
| KEGG_FOCAL_ADHESION                            | 17  | 5      | 0.26154 | 1   |
| KEGG_ERBB_SIGNALING_PATHWAY                    | 74  | 33     | 0.28486 | 1   |
| BIOCARTA_HER2_PATHWAY                          | 64  | 28     | 0.30312 | 1   |
| REACTOME_GRB2_EVENTS_IN_ERBB2_SIGNALING        | 64  | 28     | 0.30312 | 1   |
| REACTOME_ADHERENS_JUNCTIONS_INTERACTIONS       | 12  | 3      | 0.27960 | 1   |
| KEGG_ECM_RECEPTOR_INTERACTION                  | 7   | 1      | 0.27102 | 1   |
| REACTOME_ANTIGEN_PROCESSING_CROSS_PRESENTATION | 7   | 1      | 0.27102 | 1   |
| KEGG_NEUROTROPHIN_SIGNALING_PATHWAY            | 14  | 4      | 0.32153 | 1   |
| KEGG_PANCREATIC_CANCER                         | 14  | 4      | 0.32153 | 1   |
| KEGG_TOLL_LIKE_RECEPTOR_SIGNALING_PATHWAY      | 14  | 4      | 0.32153 | 1   |
| REACTOME_TOLL_RECEPTOR_CASCADES                | 14  | 4      | 0.32153 | 1   |
| BIOCARTA_CTCF_PATHWAY                          | 4   | 0      | 0.30302 | 1   |
| REACTOME_POTASSIUM_CHANNELS                    | 4   | 0      | 0.30302 | 1   |
| REACTOME_SIGNALING_BY_EGFR_IN_CANCER           | 4   | 0      | 0.30302 | 1   |
| REACTOME_SIGNALING_BY_ROBO_RECEPTOR            | 4   | 0      | 0.30302 | 1   |
| REACTOME_SIGNALING_BY_THE_B_CELL_RECEPTOR_BCR  | 4   | 0      | 0.30302 | 1   |

**Table S19: GSEA/MSigDB Analysis - rare Duplications (none are significant - top 25 are shown)**

| MSigDB Gene Set Name                                                              | CHD | No CHD | p Value | FDR |
|-----------------------------------------------------------------------------------|-----|--------|---------|-----|
| KEGG_ENDOCYTOSIS                                                                  | 10  | 0      | 0.01663 | 1   |
| REACTOME_MEMBRANE_TRAFFICKING                                                     | 9   | 0      | 0.03048 | 1   |
| REACTOME_ADAPTIVE_IMMUNE_SYSTEM                                                   | 31  | 8      | 0.04063 | 1   |
| REACTOME_IMMUNOREGULATORY_INTERACTIONS_BETWEEN_A_LYMPHOID_AND_A_NON_LYMPHOID_CELL | 8   | 0      | 0.03064 | 1   |
| REACTOME_SLC_MEDIATED_TRANSMEMBRANE_TRANSPORT                                     | 11  | 1      | 0.06531 | 1   |
| KEGG_PENTOSE_PHOSPHATE_PATHWAY                                                    | 7   | 0      | 0.05234 | 1   |
| KEGG_SPLICEOSOME                                                                  | 7   | 0      | 0.05234 | 1   |
| REACTOME_GOLGI_ASSOCIATED_VESICLE_BIOGENESIS                                      | 7   | 0      | 0.05234 | 1   |
| REACTOME_TRANS_GOLGI_NETWORK_VESICLE_BUDDING                                      | 7   | 0      | 0.05234 | 1   |
| KEGG_ERBB_SIGNALING_PATHWAY                                                       | 10  | 1      | 0.06444 | 1   |
| REACTOME_IMMUNE_SYSTEM                                                            | 40  | 14     | 0.10999 | 1   |
| BIOCARTA_MTA3_PATHWAY                                                             | 6   | 0      | 0.09174 | 1   |
| KEGG_ADIPOCYTOKINE_SIGNALING_PATHWAY                                              | 6   | 0      | 0.09174 | 1   |
| KEGG_ARRHYTHMOGENIC_RIGHT_VENTRICULAR_CARDIOMYOPATHY_ARVC                         | 6   | 0      | 0.09174 | 1   |
| KEGG_NOD_LIKE_RECEPTOR_SIGNALING_PATHWAY                                          | 6   | 0      | 0.09174 | 1   |
| REACTOME_LYSOSOME_VESICLE_BIOGENESIS                                              | 6   | 0      | 0.09174 | 1   |
| REACTOME_METABOLISM_OF_NUCLEOTIDES                                                | 6   | 0      | 0.09174 | 1   |
| REACTOME_MHC_CLASS_II_ANTIGEN_PRESENTATION                                        | 6   | 0      | 0.09174 | 1   |
| REACTOME_PROCESSING_OF_CAPPED_INTRON_CONTAINING_PRE_MRNA                          | 6   | 0      | 0.09174 | 1   |
| REACTOME_METABOLISM_OF_RNA                                                        | 12  | 2      | 0.09777 | 1   |
| REACTOME_METABOLISM_OF_MRNA                                                       | 9   | 1      | 0.10331 | 1   |
| REACTOME_NGF_SIGNALLING_VIA_TRKA_FROM_THE_PLASMA_MEMBRANE                         | 16  | 4      | 0.15969 | 1   |
| KEGG_FOCAL_ADHESION                                                               | 11  | 2      | 0.14961 | 1   |
| KEGG_NEUROTROPHIN_SIGNALING_PATHWAY                                               | 11  | 2      | 0.14961 | 1   |
| KEGG_PATHWAYS_IN_CANCER                                                           | 18  | 5      | 0.18786 | 1   |
